# Supplementary material for: Characterising long term Covid-19: a living systematic review
Source: bioRxiv or medRxiv preprint supplement (doi:10.1101/2020.12.08.20246025), 2021-05-31
Supplement: Supplementary file [file media-1.pdf]

## Table of Contents

|                                                                                      |    |
|--------------------------------------------------------------------------------------|----|
| Supplement 1: Search strategy summary .....                                          | 2  |
| <b>Appendix 1</b> .....                                                              | 4  |
| <b>Appendix 2</b> .....                                                              | 4  |
| <b>Appendix 3</b> .....                                                              | 5  |
| Supplement 2: Risk of bias assessment .....                                          | 10 |
| Supplement 3: PRISMA diagram .....                                                   | 11 |
| Supplement 4: Individual forest plots in main results .....                          | 12 |
| Supplement 5: Subgroup analysis: hospitalisation .....                               | 24 |
| Supplement 6: Subgroup analysis: Setting .....                                       | 28 |
| Supplement 7: Subgroup analysis: Continents .....                                    | 31 |
| Supplement 8: Subgroup analysis: Follow-up timing .....                              | 35 |
| Supplement 9: Meta-regression: % Female .....                                        | 37 |
| Supplement 10: Meta-regression: % ICU patients .....                                 | 39 |
| Supplement 11: Sensitivity analysis: versus removing high risk of bias studies ..... | 40 |
| Supplement 12: Sensitivity analysis: versus statistical methods .....                | 42 |
| Supplement 13: Funnel plots .....                                                    | 44 |
| Supplement 14: Risk factors .....                                                    | 53 |

## Supplement 1: Search strategy summary

| Database                                                                      | Strategy                                                                                                                                                                                                                                                                                                                                                                                                                                                                 | Results<br>(16/3/2021) |
|-------------------------------------------------------------------------------|--------------------------------------------------------------------------------------------------------------------------------------------------------------------------------------------------------------------------------------------------------------------------------------------------------------------------------------------------------------------------------------------------------------------------------------------------------------------------|------------------------|
| <b>Medline (EBSCOhost)</b>                                                    | (COVID-19 OR covid OR SARS-CoV-2. ab)<br>AND<br>(symptom* OR "clinical features" OR signs OR characteristic* OR sequela* OR complication*.ab)<br>AND<br>("long-term Covid" OR long-term OR consequence* OR "long-term impact" OR "long-term effect" OR "post-acute"<br>OR long-tail OR persist* OR "chronic-COVID" OR "long-COVID" OR post-discharge OR postdischarge OR "prolonged<br>symptom" OR "long-haul" .ab)<br><b>Limits:</b> 2020-                              | 1952                   |
| <b>CINAHL (EBSCOhost)</b>                                                     | (COVID-19 OR covid OR SARS-CoV-2. ab)<br>AND<br>(symptom* OR "clinical features" OR signs OR characteristic* OR sequela* OR complication*.ab)<br>AND<br>("long-term Covid" OR long-term OR consequence* OR "long-term impact" OR "long-term effect" OR "post-acute"<br>OR long-tail OR persist* OR "chronic-COVID" OR "long-COVID" OR post-discharge OR postdischarge OR "prolonged<br>symptom" OR "long-haul" .ab)<br><b>Limits:</b> 2020-                              | 384                    |
| <b>Global Health</b>                                                          | (COVID-19 or covid or SARS-CoV-2)<br>AND<br>(symptom* or "clinical features" or signs or characteristic* or sequelae or complication*)<br>AND<br>(((("long-term Covid" or long-term) adj2 consequence*) or "long-term impact" or "long-term effect" or "post-acute"<br>or long-tail or persist* or "chronic-COVID" or "long-COVID" or post-discharge or postdischarge or "prolonged<br>symptom" or "long-haul"))).ab.<br><b>Limits:</b> 2020-                            | 35                     |
| <b>WHO COVID-19<br/>(WHO COVID, ELSEVIER and<br/>Lanzhou University/CNKI)</b> | tw:((ab:(covid-19 OR covid OR sars-cov-2)) AND (ab:(symptom OR "clinical features" OR signs OR characteristic OR<br>sequela OR complication)) AND (ab:(("long-term Covid" OR "long-term consequence" OR "long-term impact" OR<br>"long-term effect" OR "post-acute" OR long-tail OR persist* OR "chronic-COVID" OR "long-COVID" OR post-discharge<br>OR postdischarge OR "prolonged symptom" OR "long-haul")))) AND db:(("COVIDWHO" OR "ELSEVIER" OR<br>"CNKI_Lanzhou")) | 195                    |

|                                                                                                                               |                                                                                                                                                                                                                                                                                                                                                                                                                                                                                                                                                                                                                                                                                                                                                                                                    |      |
|-------------------------------------------------------------------------------------------------------------------------------|----------------------------------------------------------------------------------------------------------------------------------------------------------------------------------------------------------------------------------------------------------------------------------------------------------------------------------------------------------------------------------------------------------------------------------------------------------------------------------------------------------------------------------------------------------------------------------------------------------------------------------------------------------------------------------------------------------------------------------------------------------------------------------------------------|------|
| <b>Lit Covid</b>                                                                                                              | (“persistent symptoms” OR “after covid-19 infection”).ti,ab,kw<br>OR<br>((“outcomes “ OR “characteristics” OR “features” OR “symptoms” OR “inflammation” OR “function” OR “complications” OR “syndrome” OR “manifestation”) ADJ10 (“long-haul” OR “recovery” OR “recovered” OR “recovering” OR “survivors” OR “post-discharge” OR “postdischarge” OR “discharge” OR “persisting” OR “prolonged” OR “long-term” OR “after admission” OR “post-COVID-19” OR “post-COVID”)).ti,ab.<br>OR<br>((“outcomes “ OR “characteristics” OR “features” OR “symptoms” OR “inflammation” OR “function” OR “complications” OR “syndrome” OR “manifestation”) ADJ10 (“after admission” OR “after hospital” OR “after hospitalisation” OR “after hospitalization” OR “after COVID-19” OR “after SARS-CoV-2”)).ti,ab. | 1432 |
| <b>Google Scholar</b>                                                                                                         | post COVID after discharge persistent symptom                                                                                                                                                                                                                                                                                                                                                                                                                                                                                                                                                                                                                                                                                                                                                      | 1000 |
| <b>Ovid Embase (top-up) [17 Mar 2021]</b>                                                                                     | See Appendix 1<br><b>Limit:</b> 2020-                                                                                                                                                                                                                                                                                                                                                                                                                                                                                                                                                                                                                                                                                                                                                              | 483  |
| <b>Ovid Medline (top-up) [17 Mar 2021]</b>                                                                                    | See Appendix 2<br><b>Limit:</b> 2020-                                                                                                                                                                                                                                                                                                                                                                                                                                                                                                                                                                                                                                                                                                                                                              | 336  |
| <b>WHO (top-up) [19 Mar 2021]<br/>(excluded: PREPRINT-BIORXVI,<br/>PREPRINT-MEDRXVI, PREPRINT-<br/>other preprint, ITCRP)</b> | See Appendix 3                                                                                                                                                                                                                                                                                                                                                                                                                                                                                                                                                                                                                                                                                                                                                                                     | 340  |

## Appendix 1

Database(s): **Embase** 1974 to 2021 March 17

| #  | Searches                                                                                                                                                  | Results  |
|----|-----------------------------------------------------------------------------------------------------------------------------------------------------------|----------|
| 1  | (long* adj3 (covid* or ncov* or novel coronavirus or novel betacoronavirus or sars-ncov-2 or sars-cov-2)).mp.                                             | 462      |
| 2  | (persist* adj3 (covid* or ncov* or novel coronavirus or novel betacoronavirus or sars-ncov-2 or sars-cov-2)).mp.                                          | 265      |
| 3  | (chronic adj3 (covid* or ncov* or novel coronavirus or novel betacoronavirus or sars-ncov-2 or sars-cov-2)).mp.                                           | 191      |
| 4  | ((long term or long-term or longterm) adj3 effect* adj3 (covid* or ncov* or novel coronavirus or novel betacoronavirus or sars-ncov-2 or sars-cov-2)).mp. | 59       |
| 5  | (sequela* adj3 (covid* or ncov* or novel coronavirus or novel betacoronavirus or sars-ncov-2 or sars-cov-2)).mp.                                          | 150      |
| 6  | ((post acute or post-acute or postacute) adj3 (covid* or ncov* or novel coronavirus or novel betacoronavirus or sars-ncov-2 or sars-cov-2)).mp.           | 38       |
| 7  | ((longhaul* or long haul* or long-haul*) adj3 (covid* or ncov* or novel coronavirus or novel betacoronavirus or sars-ncov-2 or sars-cov-2)).mp.           | 18       |
| 8  | ((post-covid* or postcovid*) adj2 (syndrome or condition)).mp.                                                                                            | 32       |
| 9  | 1 or 2 or 3 or 4 or 5 or 6 or 7 or 8                                                                                                                      | 1123     |
| 10 | symptom/                                                                                                                                                  | 151132   |
| 11 | symptom assessment/                                                                                                                                       | 8515     |
| 12 | exp complication/                                                                                                                                         | 1237024  |
| 13 | (symptom* or "clinical feature*" or signs or characteristic* or sequela* or complication*).mp.                                                            | 6906139  |
| 14 | exp physical disease by body function/                                                                                                                    | 9306422  |
| 15 | 10 or 11 or 12 or 13 or 14                                                                                                                                | 13028765 |
| 16 | 9 and 15                                                                                                                                                  | 748      |
| 17 | limit 16 to yr="2020"                                                                                                                                     | 483      |

## Appendix 2

Database(s): **Ovid MEDLINE(R) and Epub Ahead of Print, In-Process, In-Data-Review & Other Non-Indexed Citations and Daily** 1946 to March 17, 2021

| # | Searches                                                                                                                                                  | Results |
|---|-----------------------------------------------------------------------------------------------------------------------------------------------------------|---------|
| 1 | (long* adj3 (covid* or ncov* or novel coronavirus or novel betacoronavirus or sars-ncov-2 or sars-cov-2)).mp.                                             | 507     |
| 2 | (persist* adj3 (covid* or ncov* or novel coronavirus or novel betacoronavirus or sars-ncov-2 or sars-cov-2)).mp.                                          | 273     |
| 3 | (chronic adj3 (covid* or ncov* or novel coronavirus or novel betacoronavirus or sars-ncov-2 or sars-cov-2)).mp.                                           | 173     |
| 4 | ((long term or long-term or longterm) adj3 effect* adj3 (covid* or ncov* or novel coronavirus or novel betacoronavirus or sars-ncov-2 or sars-cov-2)).mp. | 62      |
| 5 | (sequela* adj3 (covid* or ncov* or novel coronavirus or novel betacoronavirus or sars-ncov-2 or sars-cov-2)).mp.                                          | 159     |
| 6 | ((post acute or post-acute or postacute) adj3 (covid* or ncov* or novel coronavirus or novel betacoronavirus or sars-ncov-2 or sars-cov-2)).mp.           | 66      |
| 7 | ((longhaul* or long haul* or long-haul*) adj3 (covid* or ncov* or novel coronavirus or novel betacoronavirus or sars-ncov-2 or sars-cov-2)).mp.           | 25      |
| 8 | ((post-covid* or postcovid*) adj2 (syndrome or condition)).mp.                                                                                            | 36      |

|    |                                                                                                |         |
|----|------------------------------------------------------------------------------------------------|---------|
| 9  | 1 or 2 or 3 or 4 or 5 or 6 or 7 or 8                                                           | 1179    |
| 10 | exp "signs and symptoms"/                                                                      | 2127623 |
| 11 | (symptom* or "clinical feature*" or signs or characteristic* or sequela* or complication*).tw. | 3644236 |
| 12 | 10 or 11                                                                                       | 5362470 |
| 13 | 9 and 12                                                                                       | 591     |
| 14 | limit 13 to yr="2020"                                                                          | 336     |

### Appendix 3

There are only three strings of syntax:

1. keywords and phrases associated with “long COVID”
2. keywords and phrases associated with “hospitalisation” and “quarantine”
3. keywords and phrases associated with “symptoms” and “complications”

The combinations of 1 AND 3 and 2 AND 3 were used to search in the combinations of title, abstract and TW (title + abstract + subjects) in the database. These consist of 18 searches as follows:

| # | Syntax                                                                                                                                                                                                                                                                                                                                                                                                                                                                                                                                                                                                                                                                                                                                                                                                                                                                                                                                                                                                                                                                                                                                                                                                                                                                                                                                                                                                                                                                                                                                                                                                                                                                                                                                                                                                                                                                                                                                                                                                                                                                                                                                                                                                                                                                                                                                                                                                                                                                                                           | Hits |
|---|------------------------------------------------------------------------------------------------------------------------------------------------------------------------------------------------------------------------------------------------------------------------------------------------------------------------------------------------------------------------------------------------------------------------------------------------------------------------------------------------------------------------------------------------------------------------------------------------------------------------------------------------------------------------------------------------------------------------------------------------------------------------------------------------------------------------------------------------------------------------------------------------------------------------------------------------------------------------------------------------------------------------------------------------------------------------------------------------------------------------------------------------------------------------------------------------------------------------------------------------------------------------------------------------------------------------------------------------------------------------------------------------------------------------------------------------------------------------------------------------------------------------------------------------------------------------------------------------------------------------------------------------------------------------------------------------------------------------------------------------------------------------------------------------------------------------------------------------------------------------------------------------------------------------------------------------------------------------------------------------------------------------------------------------------------------------------------------------------------------------------------------------------------------------------------------------------------------------------------------------------------------------------------------------------------------------------------------------------------------------------------------------------------------------------------------------------------------------------------------------------------------|------|
| 1 | (ti:(post-COVID* OR post-nCov* OR "post novel coronavirus" OR "post novel betacoronavirus" OR "post SARS-nCoV-2" OR "post SARS-CoV-2" OR postCOVID* OR "post nCov*" OR "long* COVID*" OR "long* nCov*" OR "long* novel coronavirus" OR "long* novel betacoronavirus" OR "long* SARS-nCoV-2" OR "long* SARS-CoV-2" OR "long-term COVID*" OR "long-term nCov*" OR "long-term novel coronavirus" OR "long-term novel betacoronavirus" OR "long-term SARS-nCoV-2" OR "long-term SARS-CoV-2" OR "long-term COVID*" OR "longterm COVID*" OR "post acute COVID*" OR "postacute COVID*" OR "longhaul* COVID*" OR "long haul* COVID*" OR "long-haul* COVID*" OR "chronic* COVID*" OR "prolonged* COVID*" OR "presist* COVID*" OR "long-term nCov*" OR "longterm nCov*" OR "post acute nCov*" OR "postacute nCov*" OR "longhaul* nCov*" OR "long haul* nCov*" OR "long-haul* nCov*" OR "chronic* nCov*" OR "prolonged* nCov*" OR "presist* nCov*" OR "long-term novel coronavirus" OR "longterm novel coronavirus" OR "post acute novel coronavirus" OR "postacute novel coronavirus" OR "longhaul* novel coronavirus" OR "long haul* novel coronavirus" OR "long-haul* novel coronavirus" OR "chronic* novel coronavirus" OR "prolonged* novel coronavirus" OR "presist* novel coronavirus" OR "long-term novel betacoronavirus" OR "longterm novel betacoronavirus" OR "post acute novel betacoronavirus" OR "postacute novel betacoronavirus" OR "longhaul* novel betacoronavirus" OR "long haul* novel betacoronavirus" OR "long-haul* novel betacoronavirus" OR "chronic* novel betacoronavirus" OR "prolonged* novel betacoronavirus" OR "presist* novel betacoronavirus" OR "long-term SARS-nCoV-2" OR "longterm SARS-nCoV-2" OR "post acute SARS-nCoV-2" OR "postacute SARS-nCoV-2" OR "longhaul* SARS-nCoV-2" OR "long haul* SARS-nCoV-2" OR "long-haul* SARS-nCoV-2" OR "chronic* SARS-nCoV-2" OR "prolonged* SARS-nCoV-2" OR "presist* SARS-nCoV-2" OR "long-term SARS-CoV-2" OR "longterm SARS-CoV-2" OR "post acute SARS-CoV-2" OR "postacute SARS-CoV-2" OR "longhaul* SARS-CoV-2" OR "long haul* SARS-CoV-2" OR "long-haul* SARS-CoV-2" OR "chronic* SARS-CoV-2" OR "prolonged* SARS-CoV-2" OR "presist* SARS-CoV-2") AND ti:(("clinical feature*" OR abnormal* OR characteristic* OR complication* OR condition* OR convalescence OR disorder* OR dysfunction OR illness* OR impair* OR inflammation OR manifestation OR outcome* OR prevalence OR problem* OR sequela* OR sign* OR symptom* OR syndrome)) | 135  |
| 2 | (ti:(("after admission" OR "after discharg*" OR "after hospital*" OR "after isolat*" OR "after quarantine" OR "after self isolat*" OR "after self-isolat*" OR "after self-quarantine" OR "post admission" OR "post discharg*" OR "post hospital*" OR "post isolat*" OR "post quarantine" OR "post self isolat*" OR "post self-isolat*" OR "post self-quarantine") AND ti:(("clinical feature*" OR abnormal* OR characteristic* OR complication* OR condition* OR convalescence OR disorder* OR dysfunction OR illness* OR impair* OR inflammation OR manifestation OR outcome* OR prevalence OR problem* OR sequela* OR sign* OR symptom* OR syndrome))                                                                                                                                                                                                                                                                                                                                                                                                                                                                                                                                                                                                                                                                                                                                                                                                                                                                                                                                                                                                                                                                                                                                                                                                                                                                                                                                                                                                                                                                                                                                                                                                                                                                                                                                                                                                                                                          | 11   |









|    |                                                                                                                                                                                                                                                                                                                                                                                                                                                                                                                                                                                                                                                                                                                                                                                                                                                                                                                                                                                                                                                                                                                                                                                                                                                                                                                                                                                                                                                                                                                                                                                                                                                                                                                                                                                                                                                                                                                                                                                                                                                                                                                                                                                                                                                                                                                                                                                                                                                                                                                                  |     |
|----|----------------------------------------------------------------------------------------------------------------------------------------------------------------------------------------------------------------------------------------------------------------------------------------------------------------------------------------------------------------------------------------------------------------------------------------------------------------------------------------------------------------------------------------------------------------------------------------------------------------------------------------------------------------------------------------------------------------------------------------------------------------------------------------------------------------------------------------------------------------------------------------------------------------------------------------------------------------------------------------------------------------------------------------------------------------------------------------------------------------------------------------------------------------------------------------------------------------------------------------------------------------------------------------------------------------------------------------------------------------------------------------------------------------------------------------------------------------------------------------------------------------------------------------------------------------------------------------------------------------------------------------------------------------------------------------------------------------------------------------------------------------------------------------------------------------------------------------------------------------------------------------------------------------------------------------------------------------------------------------------------------------------------------------------------------------------------------------------------------------------------------------------------------------------------------------------------------------------------------------------------------------------------------------------------------------------------------------------------------------------------------------------------------------------------------------------------------------------------------------------------------------------------------|-----|
|    | coronavirus" OR "post acute novel coronavirus" OR "postacute novel coronavirus" OR "longhaul* novel coronavirus" OR "long haul* novel coronavirus" OR "long-haul* novel coronavirus" OR "chronic* novel coronavirus" OR "prolonged* novel coronavirus" OR "persist* novel coronavirus" OR "long-term novel betacoronavirus" OR "longterm novel betacoronavirus" OR "post acute novel betacoronavirus" OR "postacute novel betacoronavirus" OR "longhaul* novel betacoronavirus" OR "long haul* novel betacoronavirus" OR "long-haul* novel betacoronavirus" OR "chronic* novel betacoronavirus" OR "prolonged* novel betacoronavirus" OR "persist* novel betacoronavirus" OR "long-term SARS-nCoV-2" OR "longterm SARS-nCoV-2" OR "post acute SARS-nCoV-2" OR "postacute SARS-nCoV-2" OR "longhaul* SARS-nCoV-2" OR "long haul* SARS-nCoV-2" OR "long-haul* SARS-nCoV-2" OR "chronic* SARS-nCoV-2" OR "prolonged* SARS-nCoV-2" OR "persist* SARS-nCoV-2" OR "long-term SARS-CoV-2" OR "longterm SARS-CoV-2" OR "post acute SARS-CoV-2" OR "postacute SARS-CoV-2" OR "longhaul* SARS-CoV-2" OR "long haul* SARS-CoV-2" OR "long-haul* SARS-CoV-2" OR "chronic* SARS-CoV-2" OR "prolonged* SARS-CoV-2" OR "persist* SARS-CoV-2") <b>AND ab:</b> ("clinical feature*" OR abnormal* OR characteristic* OR complication* OR condition* OR convalescence OR disorder* OR dysfunction OR illness* OR impair* OR inflammation OR manifestation OR outcome* OR prevalence OR problem* OR sequela* OR sign* OR symptom* OR syndrome))                                                                                                                                                                                                                                                                                                                                                                                                                                                                                                                                                                                                                                                                                                                                                                                                                                                                                                                                                                                                      |     |
| 16 | ( <b>tw:</b> ("after admission" OR "after discharg*" OR "after hospital*" OR "after isolat*" OR "after quarantine" OR "after self isolat*" OR "after self-isolat*" OR "after self-quarantine" OR "post admission" OR "post discharg*" OR "post hospital*" OR "post isolat*" OR "post quarantine" OR "post self isolat*" OR "post self-isolat*" OR "post self-quarantine") <b>AND ab:</b> ("clinical feature*" OR abnormal* OR characteristic* OR complication* OR condition* OR convalescence OR disorder* OR dysfunction OR illness* OR impair* OR inflammation OR manifestation OR outcome* OR prevalence OR problem* OR sequela* OR sign* OR symptom* OR syndrome))                                                                                                                                                                                                                                                                                                                                                                                                                                                                                                                                                                                                                                                                                                                                                                                                                                                                                                                                                                                                                                                                                                                                                                                                                                                                                                                                                                                                                                                                                                                                                                                                                                                                                                                                                                                                                                                           | 339 |
| 17 | ( <b>tw:</b> (post-COVID* OR post-nCov* OR "post novel coronavirus" OR "post novel betacoronavirus" OR "post SARS-nCoV-2" OR "post SARS-CoV-2" OR postCOVID* OR "post nCov*" OR "long* COVID*" OR "long* nCov*" OR "long* novel coronavirus" OR "long* novel betacoronavirus" OR "long* SARS-nCoV-2" OR "long* SARS-CoV-2" OR "long-term COVID*" OR "long-term nCov*" OR "long-term novel coronavirus" OR "long-term novel betacoronavirus" OR "long-term SARS-nCoV-2" OR "long-term SARS-CoV-2" OR "long-term COVID*" OR "longterm COVID*" OR "post acute COVID*" OR "postacute COVID*" OR "longhaul* COVID*" OR "long haul* COVID*" OR "long-haul* COVID*" OR "chronic* COVID*" OR "prolonged* COVID*" OR "persist* COVID*" OR "long-term nCov*" OR "longterm nCov*" OR "post acute nCov*" OR "postacute nCov*" OR "longhaul* nCov*" OR "long haul* nCov*" OR "long-haul* nCov*" OR "chronic* nCov*" OR "prolonged* nCov*" OR "persist* nCov*" OR "long-term novel coronavirus" OR "longterm novel coronavirus" OR "post acute novel coronavirus" OR "postacute novel coronavirus" OR "longhaul* novel coronavirus" OR "long haul* novel coronavirus" OR "long-haul* novel coronavirus" OR "chronic* novel coronavirus" OR "prolonged* novel coronavirus" OR "persist* novel coronavirus" OR "long-term novel betacoronavirus" OR "longterm novel betacoronavirus" OR "post acute novel betacoronavirus" OR "postacute novel betacoronavirus" OR "longhaul* novel betacoronavirus" OR "long haul* novel betacoronavirus" OR "long-haul* novel betacoronavirus" OR "chronic* novel betacoronavirus" OR "prolonged* novel betacoronavirus" OR "persist* novel betacoronavirus" OR "long-term SARS-nCoV-2" OR "longterm SARS-nCoV-2" OR "post acute SARS-nCoV-2" OR "postacute SARS-nCoV-2" OR "longhaul* SARS-nCoV-2" OR "long haul* SARS-nCoV-2" OR "long-haul* SARS-nCoV-2" OR "chronic* SARS-nCoV-2" OR "prolonged* SARS-nCoV-2" OR "persist* SARS-nCoV-2" OR "long-term SARS-CoV-2" OR "longterm SARS-CoV-2" OR "post acute SARS-CoV-2" OR "postacute SARS-CoV-2" OR "longhaul* SARS-CoV-2" OR "long haul* SARS-CoV-2" OR "long-haul* SARS-CoV-2" OR "chronic* SARS-CoV-2" OR "prolonged* SARS-CoV-2" OR "persist* SARS-CoV-2") <b>AND tw:</b> ("clinical feature*" OR abnormal* OR characteristic* OR complication* OR condition* OR convalescence OR disorder* OR dysfunction OR illness* OR impair* OR inflammation OR manifestation OR outcome* OR prevalence OR problem* OR sequela* OR sign* OR symptom* OR syndrome)) | 906 |
| 18 | ( <b>tw:</b> ("after admission" OR "after discharg*" OR "after hospital*" OR "after isolat*" OR "after quarantine" OR "after self isolat*" OR "after self-isolat*" OR "after self-quarantine" OR "post admission" OR "post discharg*" OR "post hospital*" OR "post isolat*" OR "post quarantine" OR "post self isolat*" OR "post self-isolat*" OR "post self-quarantine") <b>AND tw:</b> ("clinical feature*" OR abnormal* OR characteristic* OR complication* OR condition* OR convalescence OR disorder* OR dysfunction OR illness* OR impair* OR inflammation OR manifestation OR outcome* OR prevalence OR problem* OR sequela* OR sign* OR symptom* OR syndrome))                                                                                                                                                                                                                                                                                                                                                                                                                                                                                                                                                                                                                                                                                                                                                                                                                                                                                                                                                                                                                                                                                                                                                                                                                                                                                                                                                                                                                                                                                                                                                                                                                                                                                                                                                                                                                                                           | 340 |

## Supplement 2: Risk of bias assessment

| Study                | Representation of national population (e.g. age, sex, occupation) | Sampling frame true or close representation of target population | Random selection used to select sample, OR, census undertaken | Likelihood of non-response bias minimal | Data collected directly from subjects (opposed to proxy) | Acceptable case definition used | Instrument to measure parameter of interest has reliability and validity (if necessary) | Same mode of data collection used for all subjects | Length of shortest prevalence period for parameter of interest appropriate | Numerator(s)/denominator(s) for parameter of interest appropriate | Overall risk of bias |
|----------------------|-------------------------------------------------------------------|------------------------------------------------------------------|---------------------------------------------------------------|-----------------------------------------|----------------------------------------------------------|---------------------------------|-----------------------------------------------------------------------------------------|----------------------------------------------------|----------------------------------------------------------------------------|-------------------------------------------------------------------|----------------------|
| Alharthy et al.      | ●                                                                 | ●                                                                | ●                                                             | ●                                       | ●                                                        | ●                               | ●                                                                                       | ●                                                  | ●                                                                          | ●                                                                 | ●                    |
| Anastasio et al.     | ●                                                                 | ●                                                                | ●                                                             | ●                                       | ●                                                        | ●                               | ●                                                                                       | ●                                                  | ●                                                                          | ●                                                                 | ●                    |
| Arnold et al.        | ●                                                                 | ●                                                                | ●                                                             | ●                                       | ●                                                        | ●                               | ●                                                                                       | ●                                                  | ●                                                                          | ●                                                                 | ●                    |
| Baricich et al.      | ●                                                                 | ●                                                                | ●                                                             | ●                                       | ●                                                        | ●                               | ●                                                                                       | ●                                                  | ●                                                                          | ●                                                                 | ●                    |
| Bellan et al.        | ●                                                                 | ●                                                                | ●                                                             | ●                                       | ●                                                        | ●                               | ●                                                                                       | ●                                                  | ●                                                                          | ●                                                                 | ●                    |
| Bianco et al.        | ●                                                                 | ●                                                                | ●                                                             | ●                                       | ●                                                        | ●                               | ●                                                                                       | ●                                                  | ●                                                                          | ●                                                                 | ●                    |
| Doyle et al.         | ●                                                                 | ●                                                                | ●                                                             | ●                                       | ●                                                        | ●                               | ●                                                                                       | ●                                                  | ●                                                                          | ●                                                                 | ●                    |
| Einvik et al.        | ●                                                                 | ●                                                                | ●                                                             | ●                                       | ●                                                        | ●                               | ●                                                                                       | ●                                                  | ●                                                                          | ●                                                                 | ●                    |
| Garrigues et al.     | ●                                                                 | ●                                                                | ●                                                             | ●                                       | ●                                                        | ●                               | ●                                                                                       | ●                                                  | ●                                                                          | ●                                                                 | ●                    |
| Gherlone et al.      | ●                                                                 | ●                                                                | ●                                                             | ●                                       | ●                                                        | ●                               | ●                                                                                       | ●                                                  | ●                                                                          | ●                                                                 | ●                    |
| Han et al.           | ●                                                                 | ●                                                                | ●                                                             | ●                                       | ●                                                        | ●                               | ●                                                                                       | ●                                                  | ●                                                                          | ●                                                                 | ●                    |
| Hopkins et al.       | ●                                                                 | ●                                                                | ●                                                             | ●                                       | ●                                                        | ●                               | ●                                                                                       | ●                                                  | ●                                                                          | ●                                                                 | ●                    |
| Huang et al.         | ●                                                                 | ●                                                                | ●                                                             | ●                                       | ●                                                        | ●                               | ●                                                                                       | ●                                                  | ●                                                                          | ●                                                                 | ●                    |
| Jacobson et al.      | ●                                                                 | ●                                                                | ●                                                             | ●                                       | ●                                                        | ●                               | ●                                                                                       | ●                                                  | ●                                                                          | ●                                                                 | ●                    |
| Klein et al.         | ●                                                                 | ●                                                                | ●                                                             | ●                                       | ●                                                        | ●                               | ●                                                                                       | ●                                                  | ●                                                                          | ●                                                                 | ●                    |
| Lerum et al.         | ●                                                                 | ●                                                                | ●                                                             | ●                                       | ●                                                        | ●                               | ●                                                                                       | ●                                                  | ●                                                                          | ●                                                                 | ●                    |
| Logue et al.         | ●                                                                 | ●                                                                | ●                                                             | ●                                       | ●                                                        | ●                               | ●                                                                                       | ●                                                  | ●                                                                          | ●                                                                 | ●                    |
| Mazza et al.         | ●                                                                 | ●                                                                | ●                                                             | ●                                       | ●                                                        | ●                               | ●                                                                                       | ●                                                  | ●                                                                          | ●                                                                 | ●                    |
| Mendez et al.        | ●                                                                 | ●                                                                | ●                                                             | ●                                       | ●                                                        | ●                               | ●                                                                                       | ●                                                  | ●                                                                          | ●                                                                 | ●                    |
| Nguyen et al.        | ●                                                                 | ●                                                                | ●                                                             | ●                                       | ●                                                        | ●                               | ●                                                                                       | ●                                                  | ●                                                                          | ●                                                                 | ●                    |
| Nugent et al.        | ●                                                                 | ●                                                                | ●                                                             | ●                                       | ●                                                        | ●                               | ●                                                                                       | ●                                                  | ●                                                                          | ●                                                                 | ●                    |
| Parente-Arias et al. | ●                                                                 | ●                                                                | ●                                                             | ●                                       | ●                                                        | ●                               | ●                                                                                       | ●                                                  | ●                                                                          | ●                                                                 | ●                    |
| Petersen et al.      | ●                                                                 | ●                                                                | ●                                                             | ●                                       | ●                                                        | ●                               | ●                                                                                       | ●                                                  | ●                                                                          | ●                                                                 | ●                    |
| Qin et al.           | ●                                                                 | ●                                                                | ●                                                             | ●                                       | ●                                                        | ●                               | ●                                                                                       | ●                                                  | ●                                                                          | ●                                                                 | ●                    |
| Qu et al.            | ●                                                                 | ●                                                                | ●                                                             | ●                                       | ●                                                        | ●                               | ●                                                                                       | ●                                                  | ●                                                                          | ●                                                                 | ●                    |
| Rass et al.          | ●                                                                 | ●                                                                | ●                                                             | ●                                       | ●                                                        | ●                               | ●                                                                                       | ●                                                  | ●                                                                          | ●                                                                 | ●                    |
| Sibila et al.        | ●                                                                 | ●                                                                | ●                                                             | ●                                       | ●                                                        | ●                               | ●                                                                                       | ●                                                  | ●                                                                          | ●                                                                 | ●                    |
| Simani et al.        | ●                                                                 | ●                                                                | ●                                                             | ●                                       | ●                                                        | ●                               | ●                                                                                       | ●                                                  | ●                                                                          | ●                                                                 | ●                    |
| Sonnweber et al.     | ●                                                                 | ●                                                                | ●                                                             | ●                                       | ●                                                        | ●                               | ●                                                                                       | ●                                                  | ●                                                                          | ●                                                                 | ●                    |
| Stavem et al.        | ●                                                                 | ●                                                                | ●                                                             | ●                                       | ●                                                        | ●                               | ●                                                                                       | ●                                                  | ●                                                                          | ●                                                                 | ●                    |
| Suarez-Robles et al. | ●                                                                 | ●                                                                | ●                                                             | ●                                       | ●                                                        | ●                               | ●                                                                                       | ●                                                  | ●                                                                          | ●                                                                 | ●                    |
| Sykes et al.         | ●                                                                 | ●                                                                | ●                                                             | ●                                       | ●                                                        | ●                               | ●                                                                                       | ●                                                  | ●                                                                          | ●                                                                 | ●                    |
| Taboada et al.       | ●                                                                 | ●                                                                | ●                                                             | ●                                       | ●                                                        | ●                               | ●                                                                                       | ●                                                  | ●                                                                          | ●                                                                 | ●                    |
| Venturelli et al.    | ●                                                                 | ●                                                                | ●                                                             | ●                                       | ●                                                        | ●                               | ●                                                                                       | ●                                                  | ●                                                                          | ●                                                                 | ●                    |
| Weng et al.          | ●                                                                 | ●                                                                | ●                                                             | ●                                       | ●                                                        | ●                               | ●                                                                                       | ●                                                  | ●                                                                          | ●                                                                 | ●                    |
| Xiong et al.         | ●                                                                 | ●                                                                | ●                                                             | ●                                       | ●                                                        | ●                               | ●                                                                                       | ●                                                  | ●                                                                          | ●                                                                 | ●                    |
| Xu et al.            | ●                                                                 | ●                                                                | ●                                                             | ●                                       | ●                                                        | ●                               | ●                                                                                       | ●                                                  | ●                                                                          | ●                                                                 | ●                    |
| Zhang et al. (a)     | ●                                                                 | ●                                                                | ●                                                             | ●                                       | ●                                                        | ●                               | ●                                                                                       | ●                                                  | ●                                                                          | ●                                                                 | ●                    |
| Zhang et al. (b)     | ●                                                                 | ●                                                                | ●                                                             | ●                                       | ●                                                        | ●                               | ●                                                                                       | ●                                                  | ●                                                                          | ●                                                                 | ●                    |

● Low Risk ● Moderate risk ● High risk

### Supplement 3: PRISMA diagram

#### Identification of new studies via databases and registers

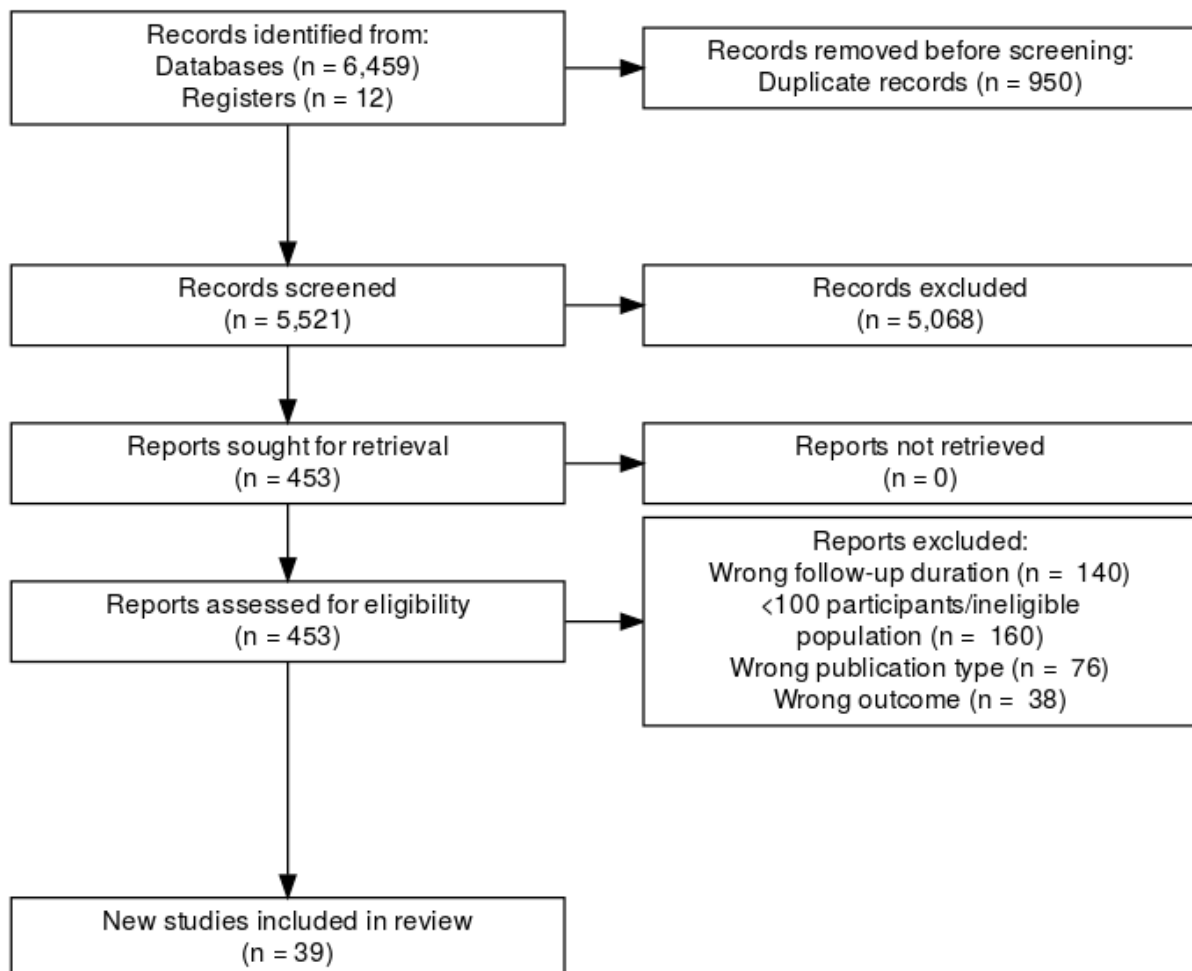

## Supplement 4: Individual forest plots in main results

Figure 1. Cardiopulmonary

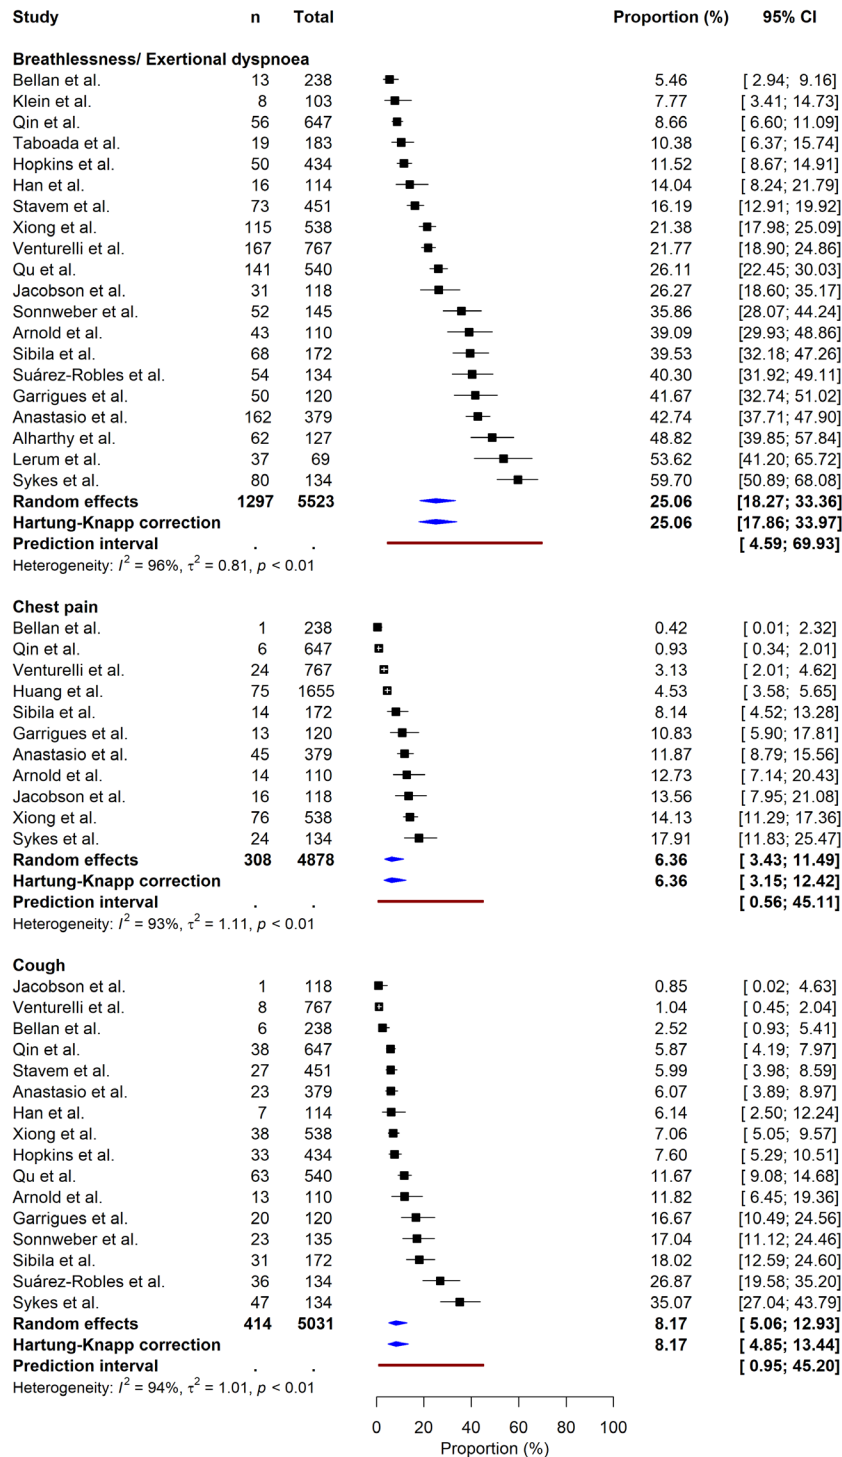

Figure 2. Cardiopulmonary (page 2)

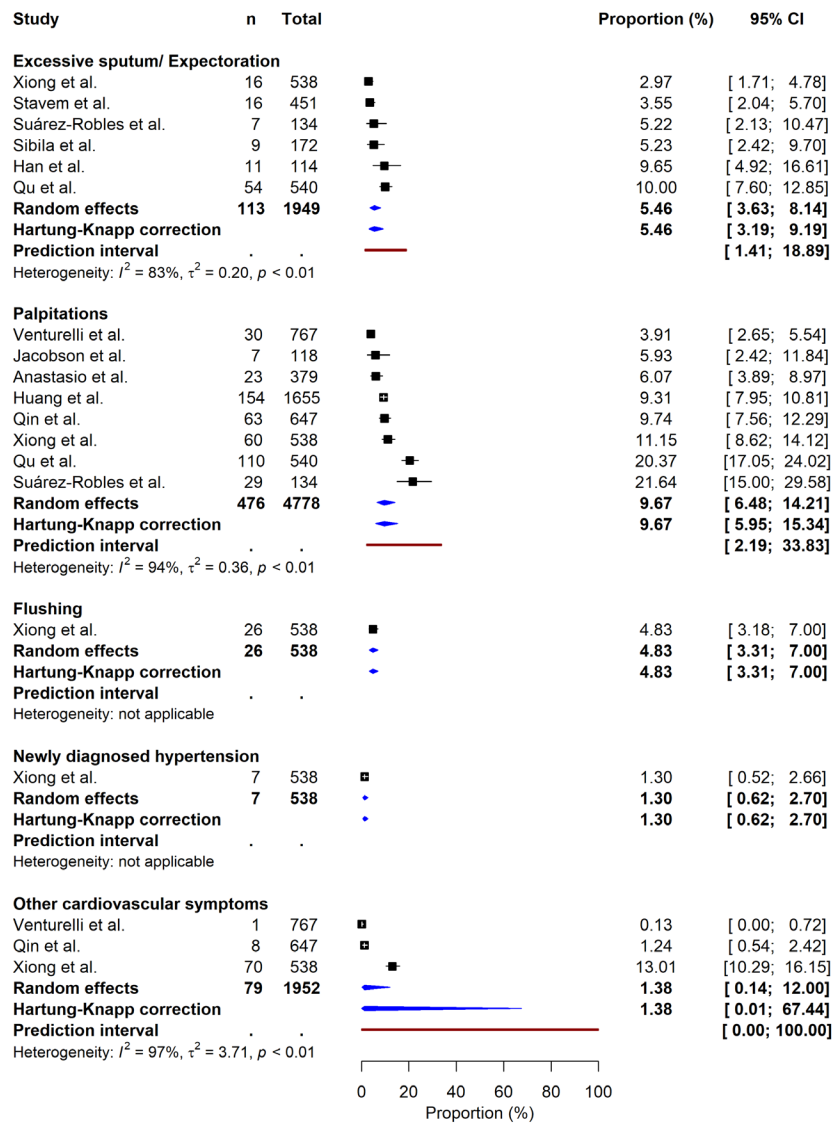

Figure 3. Gastrointestinal

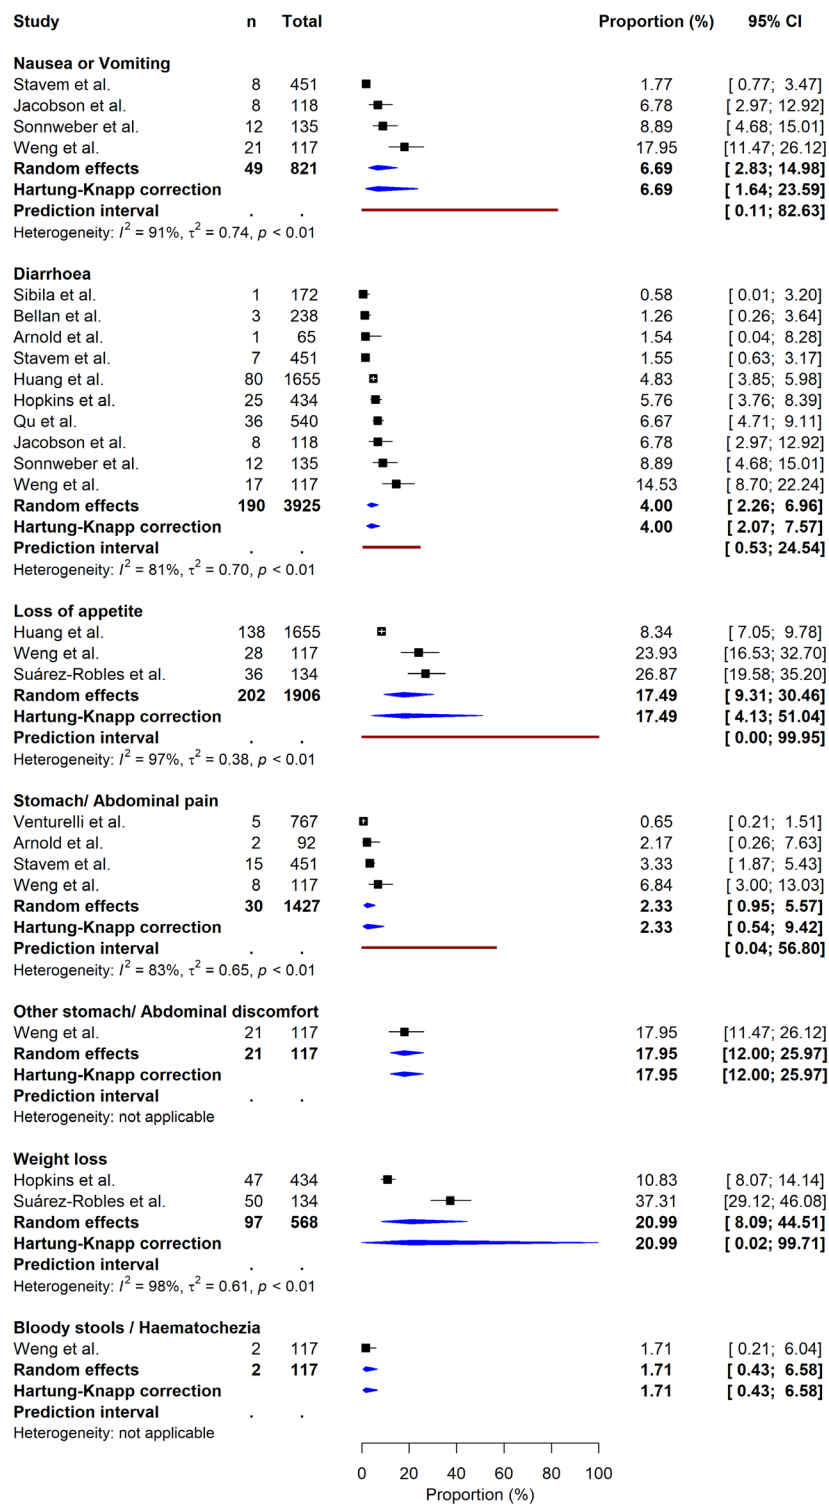

Figure 4. Musculoskeletal

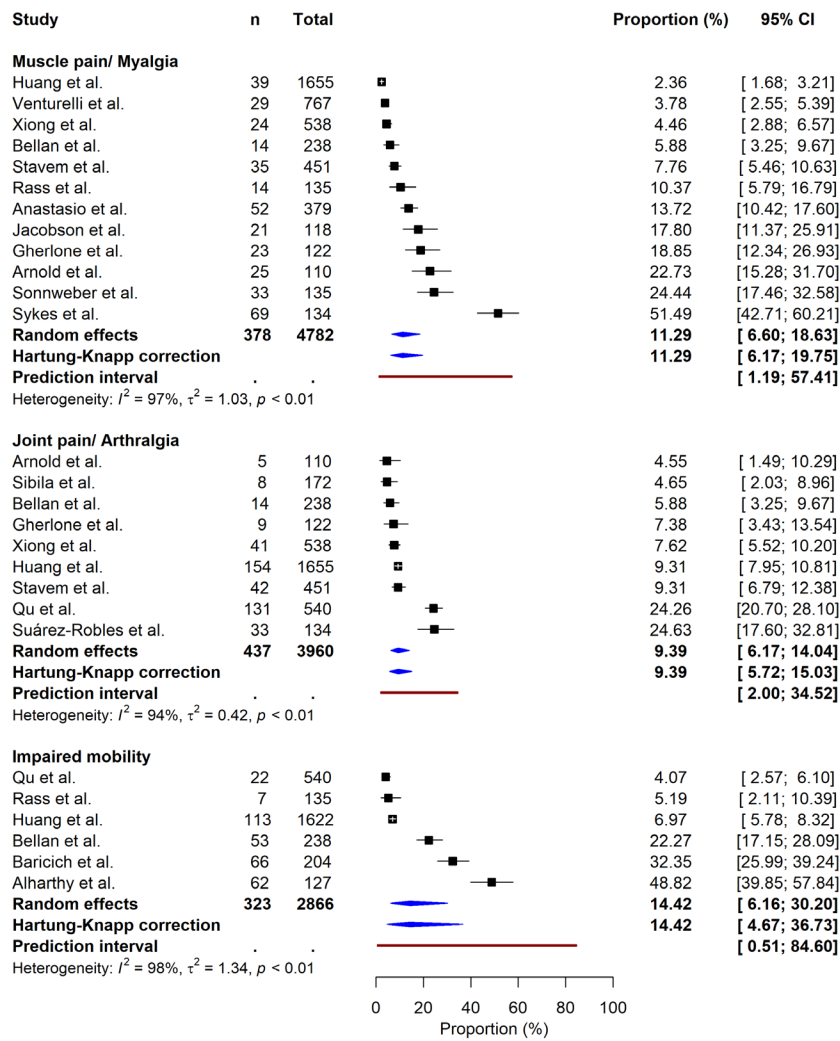

Figure 5. Neurocognitive

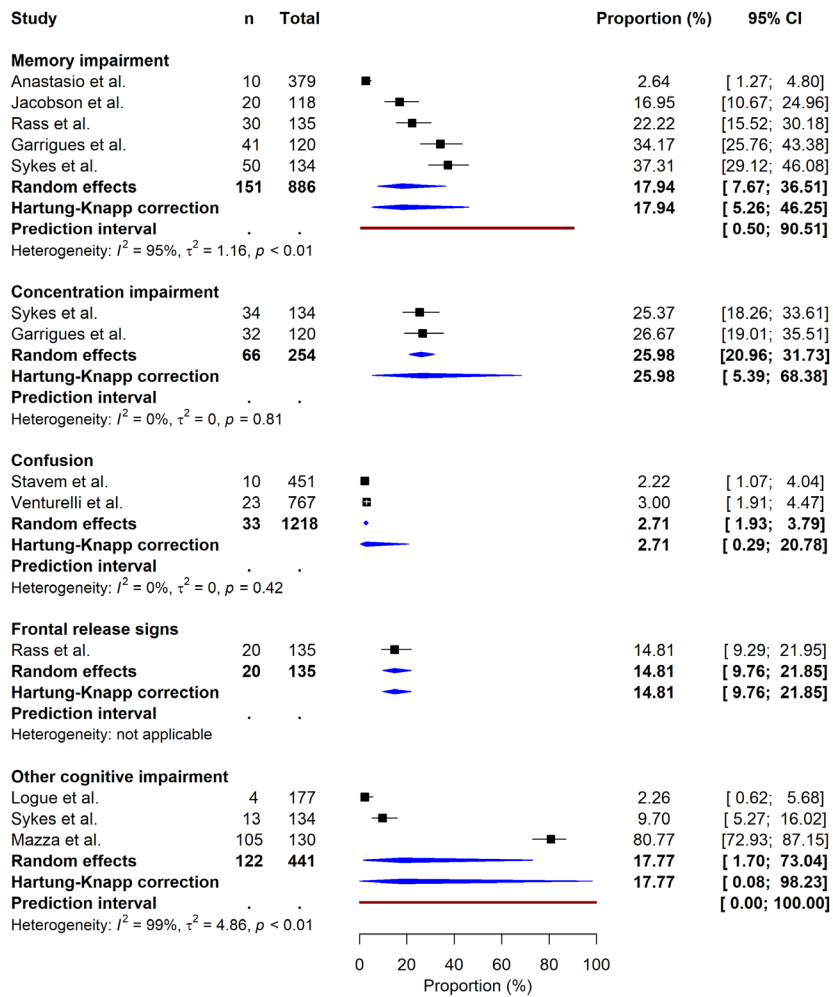



Figure 6. Neurological and neuromuscular

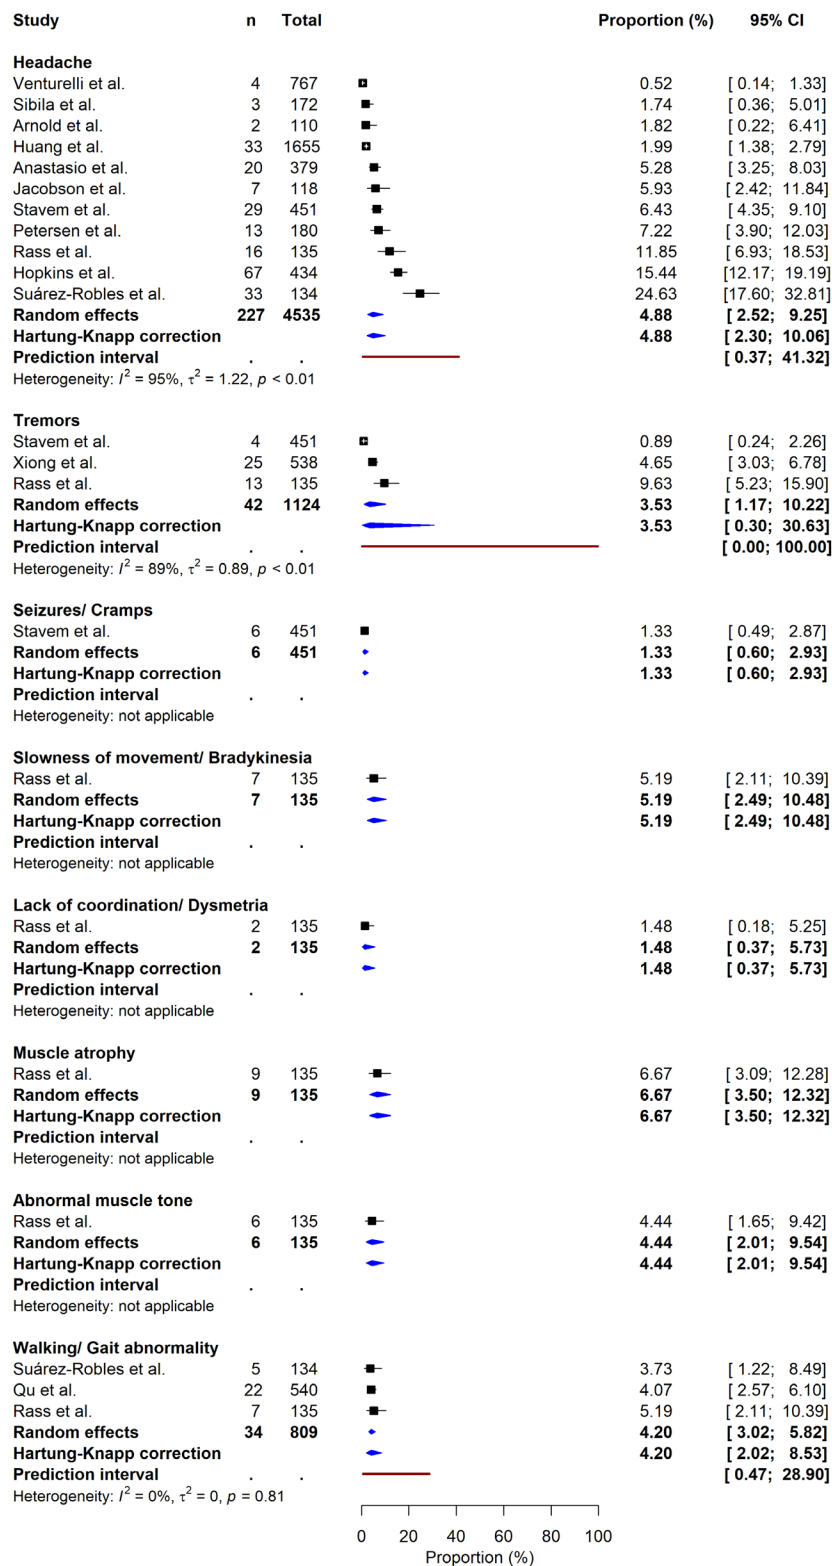

Figure 7. Neurological and neuromuscular (page 2)

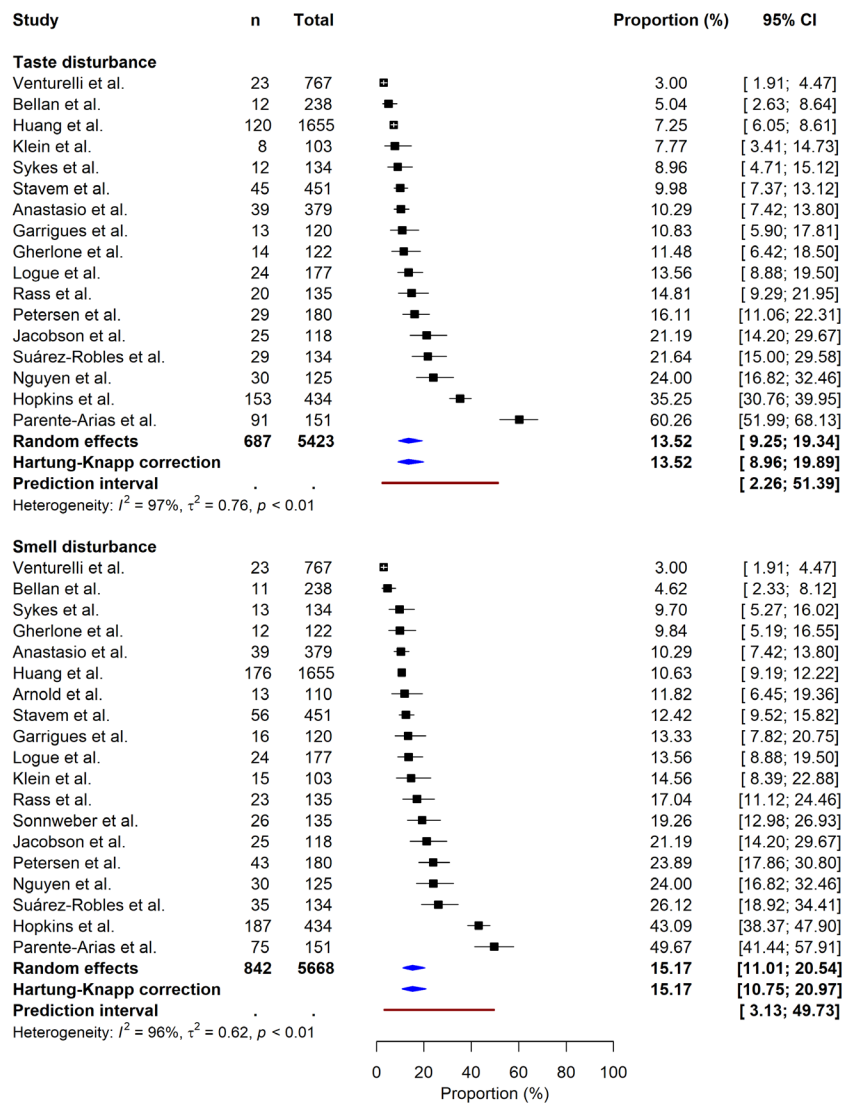

Figure 8. Neurological and neuromuscular (page 3)

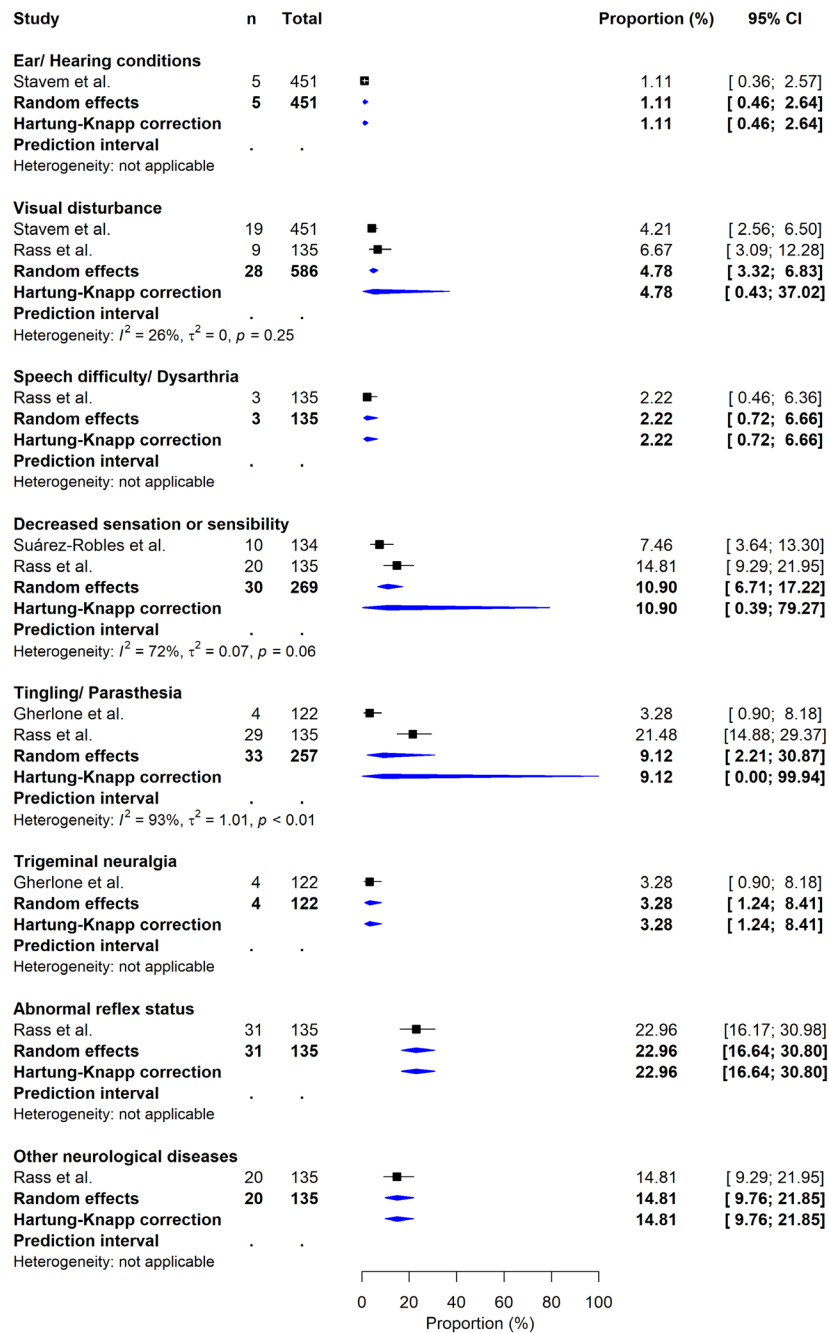

Figure 9. Other

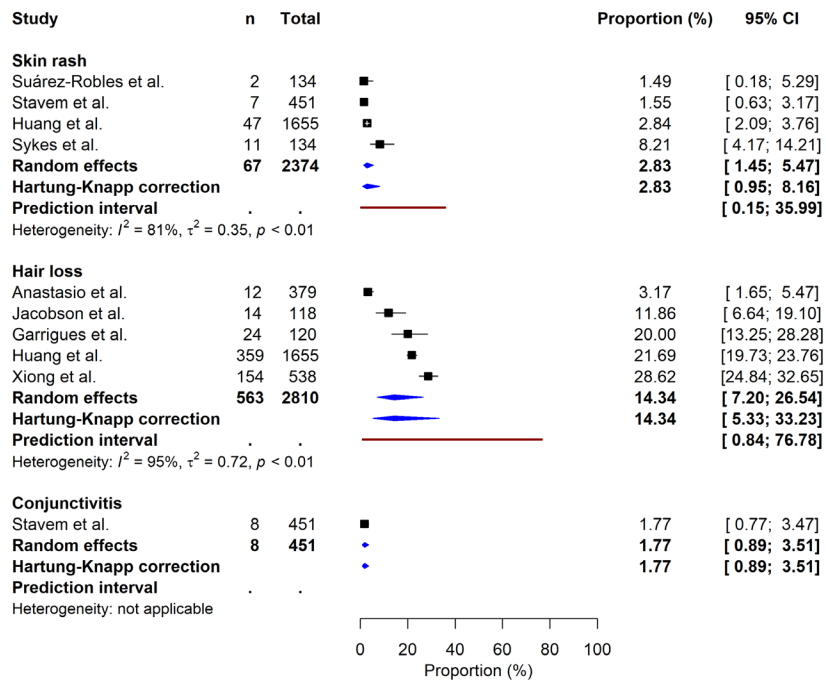

Figure 10. Psychological and social

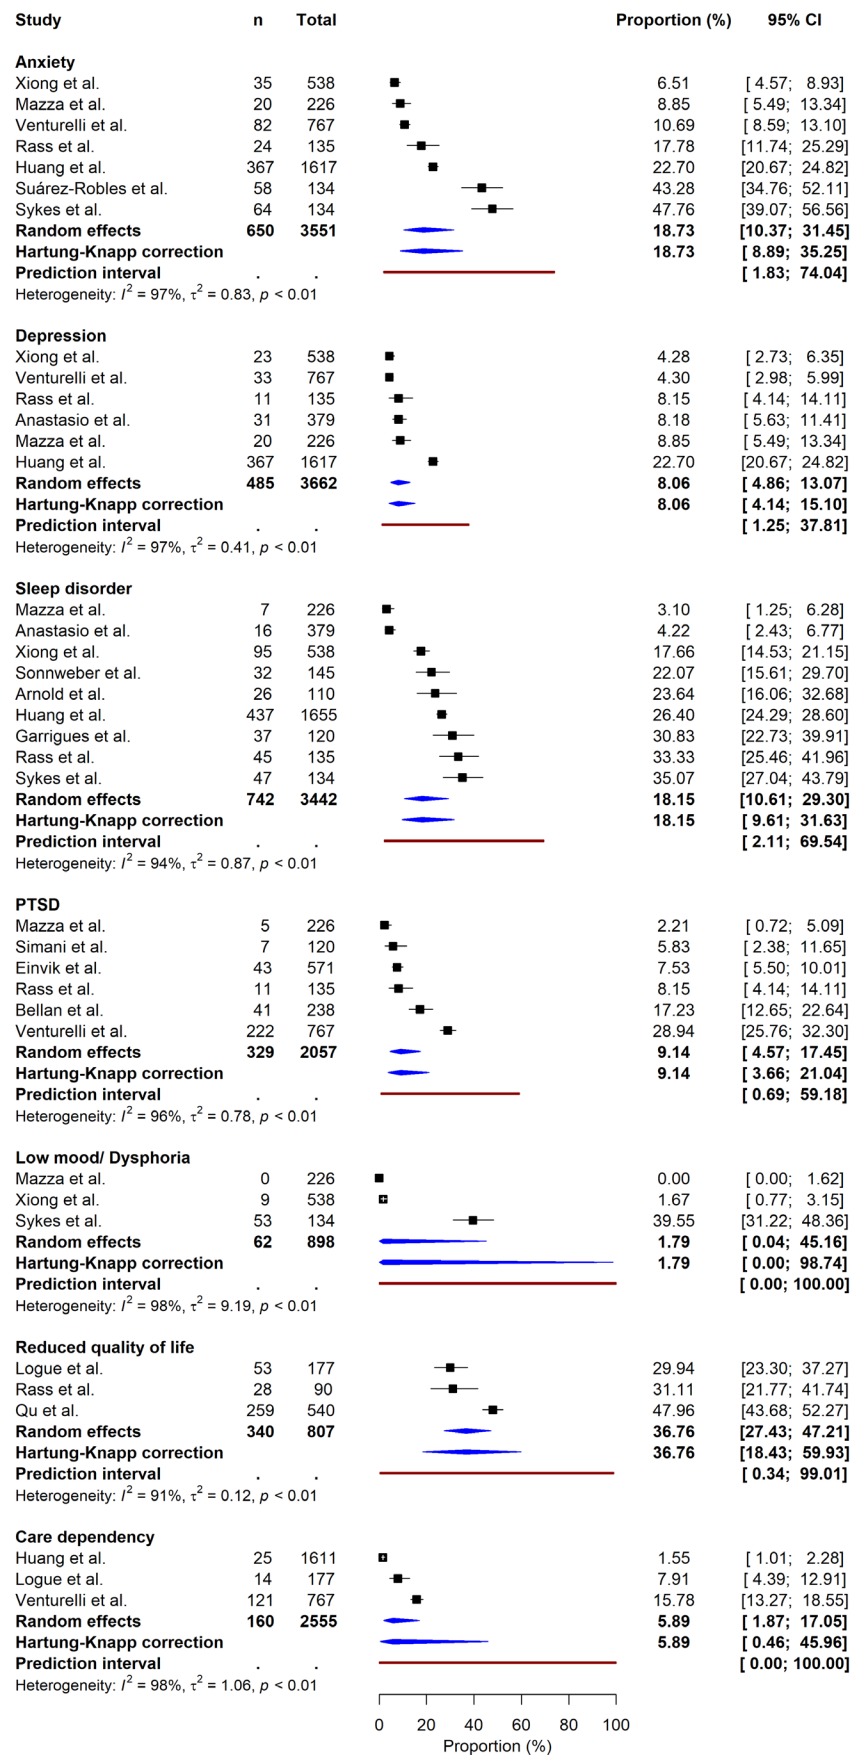

Figure 11. Systemic

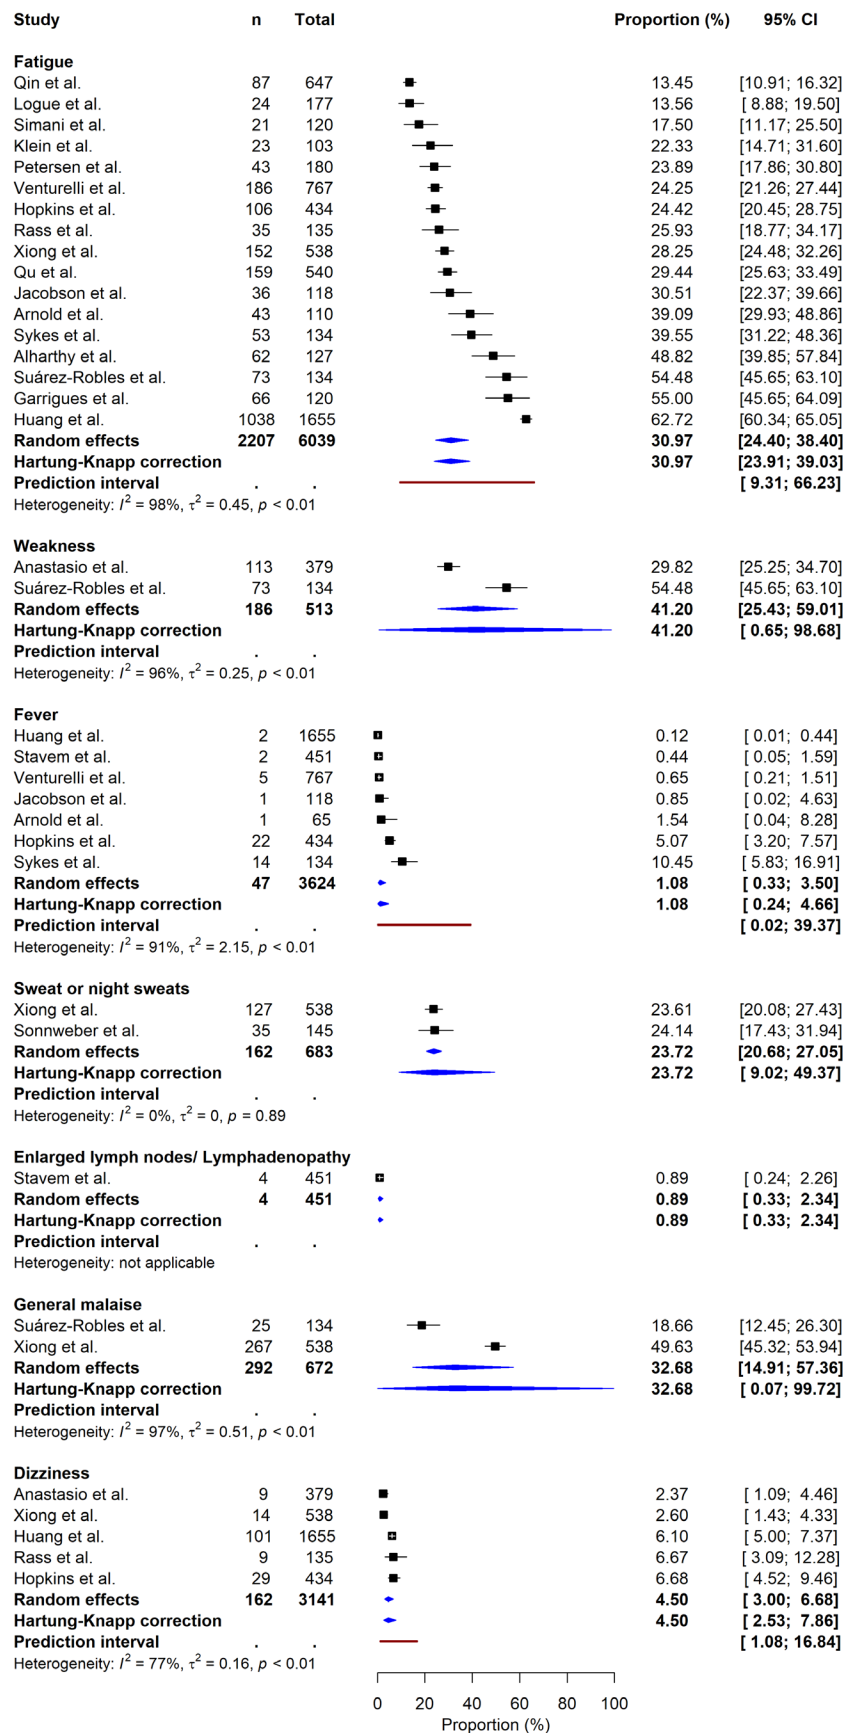

Figure 12. Upper respiratory

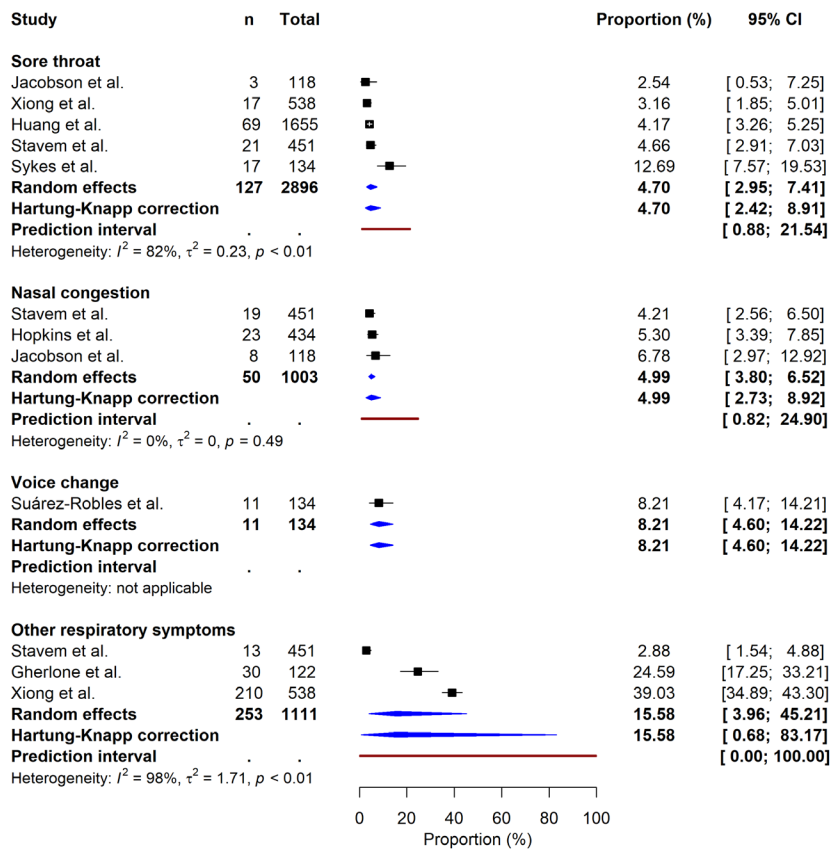

## Supplement 5: Subgroup analysis: hospitalisation

| Classification   | Symptom                             | Subgroup         | N Studies | Event/total            | Proportion% (95% CIs)  | Heterogeneity (%) | P value |
|------------------|-------------------------------------|------------------|-----------|------------------------|------------------------|-------------------|---------|
| Cardiopulmonary  | Breathlessness/ Exertional dyspnoea | Hospitalised     | n = 14    | 765/3148               | 28.68 (18.48 to 41.64) | 96.19             | <0.001  |
|                  |                                     | Mixed            | n = 3     | 381/1291               | 32.57 (14.26 to 58.38) | 96.38             |         |
|                  |                                     | Non-hospitalised | n = 4     | 151/1084               | 13.72 (8.51 to 21.37)  | 72.13             |         |
|                  | Chest pain                          | Mixed            | n = 2     | 69/1146                | 6.18 (0.01 to 97.66)   | 96.65             | 0.071   |
|                  |                                     | Hospitalised     | n = 9     | 225/3636               | 5.92 (2.45 to 13.63)   | 92.86             |         |
|                  |                                     | Non-hospitalised | n = 1     | 14/ 96                 | 14.58 (8.83 to 23.13)  | NA                |         |
|                  | Cough                               | Mixed            | n = 3     | 54/1281                | 4.91 (0.25 to 51.82)   | 96.03             | 0.265   |
|                  |                                     | Hospitalised     | n = 11    | 299/2769               | 10.52 (5.93 to 17.98)  | 93.05             |         |
|                  |                                     | Non-hospitalised | n = 3     | 61/981                 | 5.95 (1.53 to 20.50)   | 56.24             |         |
|                  | Excessive sputum/ Expectorations    | Hospitalised     | n = 5     | 97/1498                | 6.02 (3.20 to 11.03)   | 82.16             | 0.112   |
|                  |                                     | Non-hospitalised | n = 1     | 16/451                 | 3.55 (2.18 to 5.71)    | NA                |         |
|                  | Other cardiovascular symptoms       | Hospitalised     | n = 2     | 78/1185                | 4.20 (0.00 to 99.97)   | 97.68             | 0.009   |
|                  |                                     | Mixed            | n = 1     | 1/767                  | 0.13 (0.02 to 0.92)    | NA                |         |
|                  | Palpitations                        | Mixed            | n = 2     | 53/1146                | 4.67 (0.60 to 28.47)   | 62.05             | <0.001  |
|                  |                                     | Hospitalised     | n = 6     | 416/3536               | 12.43 (7.78 to 19.29)  | 91.7              |         |
| Non-hospitalised |                                     | n = 1            | 7/ 96     | 7.29 (3.52 to 14.51)   | NA                     |                   |         |
| Gastrointestinal | Diarrhoea                           | Hospitalised     | n = 7     | 138/2809               | 2.93 (0.90 to 9.12)    | 81.91             | 0.077   |
|                  |                                     | Non-hospitalised | n = 3     | 40/981                 | 4.16 (0.72 to 20.65)   | 84.27             |         |
|                  |                                     | Mixed            | n = 1     | 12/135                 | 8.89 (5.12 to 15.00)   | NA                |         |
|                  | Nausea or Vomiting                  | Hospitalised     | n = 2     | 21/139                 | 5.84 (0.00 to 100.00)  | 0                 | 0.343   |
|                  |                                     | Non-hospitalised | n = 2     | 16/547                 | 3.66 (0.00 to 98.24)   | 89.91             |         |
|                  |                                     | Mixed            | n = 1     | 12/135                 | 8.89 (5.12 to 15.00)   | NA                |         |
|                  | Stomach/ Abdominal pain             | Hospitalised     | n = 2     | 10/209                 | 4.63 (0.03 to 89.20)   | 54.79             | 0.002   |
|                  |                                     | Non-hospitalised | n = 1     | 15/451                 | 3.33 (2.01 to 5.44)    | NA                |         |
|                  |                                     | Mixed            | n = 1     | 5/767                  | 0.65 (0.27 to 1.56)    | NA                |         |
| Weight loss      | Non-hospitalised                    | n = 1            | 47/434    | 10.83 (8.23 to 14.12)  | NA                     | <0.001            |         |
|                  | Hospitalised                        | n = 1            | 50/134    | 37.31 (29.55 to 45.79) | NA                     |                   |         |
| Musculoskeletal  | Impaired mobility                   | Hospitalised     | n = 5     | 316/2731               | 17.33 (4.75 to 46.83)  | 98.49             | 0.038   |
|                  |                                     | Mixed            | n = 1     | 7/135                  | 5.19 (2.49 to 10.48)   | NA                |         |



|                           |                                |                                    |              |                      |                        |                       |        |       |
|---------------------------|--------------------------------|------------------------------------|--------------|----------------------|------------------------|-----------------------|--------|-------|
|                           | Joint pain/ Arthralgia         | Hospitalised                       | n = 8        | 395/3509             | 9.36 (5.25 to 16.14)   | 94.81                 | 0.987  |       |
|                           |                                | Non-hospitalised                   | n = 1        | 42/451               | 9.31 (6.95 to 12.36)   | NA                    |        |       |
|                           | Muscle pain/ Myalgia           | Mixed                              | n = 4        | 128/1416             | 10.86 (3.45 to 29.36)  | 95.21                 | 0.954  |       |
|                           |                                | Hospitalised                       | n = 7        | 199/2819             | 12.46 (4.30 to 31.09)  | 98.05                 |        |       |
|                           |                                | Non-hospitalised                   | n = 2        | 51/547               | 10.76 (0.24 to 85.64)  | 85.87                 |        |       |
|                           |                                | Non-hospitalised                   | n = 1        | 10/451               | 2.22 (1.20 to 4.07)    | NA                    |        |       |
| Neurocognitive            | Confusion                      | Mixed                              | n = 1        | 23/767               | 3.00 (2.00 to 4.47)    | NA                    | 0.419  |       |
|                           |                                | Mixed                              | n = 2        | 40/514               | 8.06 (0.00 to 99.97)   | 97.38                 |        |       |
|                           | Memory impairment              | Hospitalised                       | n = 3        | 96/276               | 34.78 (23.64 to 47.88) | 0                     | <0.001 |       |
|                           |                                | Non-hospitalised                   | n = 1        | 15/ 96               | 15.62 (9.64 to 24.32)  | NA                    |        |       |
|                           | Other cognitive impairment     | Mixed                              | n = 2        | 109/307              | 23.55 (0.00 to 100.00) | 98.87                 | 0.581  |       |
|                           |                                | Hospitalised                       | n = 1        | 13/134               | 9.70 (5.72 to 15.99)   | NA                    |        |       |
|                           | Neurological and neuromuscular | Decreased sensation or sensibility | Mixed        | n = 1                | 20/135                 | 14.81 (9.76 to 21.85) | NA     | 0.060 |
|                           |                                |                                    | Hospitalised | n = 1                | 10/134                 | 7.46 (4.06 to 13.31)  | NA     |       |
|                           |                                | Headache                           | Mixed        | n = 3                | 40/1281                | 3.30 (0.12 to 50.20)  | 93.93  | 0.145 |
|                           |                                |                                    | Hospitalised | n = 5                | 71/2093                | 2.98 (0.47 to 16.53)  | 96.56  |       |
|                           |                                | Non-hospitalised                   | n = 4        | 116/1161             | 8.82 (4.41 to 16.85)   | 86.25                 | 0.108  |       |
|                           |                                | Mixed                              | n = 6        | 210/1744             | 14.63 (5.46 to 33.72)  | 97.32                 |        |       |
| Smell disturbance         |                                | Hospitalised                       | n = 9        | 308/2660             | 12.16 (7.98 to 18.10)  | 85.48                 | 0.108  |       |
|                           |                                | Non-hospitalised                   | n = 5        | 324/1264             | 22.19 (11.69 to 38.04) | 96.3                  |        |       |
| Taste disturbance         |                                | Mixed                              | n = 5        | 197/1609             | 14.50 (3.40 to 44.98)  | 98.32                 | 0.425  |       |
|                           |                                | Hospitalised                       | n = 8        | 232/2550             | 11.07 (6.90 to 17.28)  | 89.1                  |        |       |
|                           |                                | Non-hospitalised                   | n = 5        | 258/1264             | 16.83 (7.91 to 32.26)  | 95.66                 | <0.001 |       |
|                           |                                | Hospitalised                       | n = 1        | 4/122                | 3.28 (1.24 to 8.41)    | NA                    |        |       |
| Tingling/ Paraesthesia    |                                | Mixed                              | n = 1        | 29/135               | 21.48 (15.36 to 29.21) | NA                    | <0.001 |       |
|                           |                                | Mixed                              | n = 1        | 13/135               | 9.63 (5.67 to 15.88)   | NA                    |        |       |
| Tremors                   |                                | Non-hospitalised                   | n = 1        | 4/451                | 0.89 (0.33 to 2.34)    | NA                    | <0.001 |       |
|                           |                                | Hospitalised                       | n = 1        | 25/538               | 4.65 (3.16 to 6.79)    | NA                    |        |       |
| Visual disturbance        |                                | Mixed                              | n = 1        | 9/135                | 6.67 (3.50 to 12.32)   | NA                    | 0.245  |       |
|                           |                                | Non-hospitalised                   | n = 1        | 19/451               | 4.21 (2.70 to 6.51)    | NA                    |        |       |
| Walking/ Gait abnormality | Hospitalised                   | n = 2                              | 27/674       | 4.01 (0.34 to 33.61) | 0                      | 0.534                 |        |       |
|                           | Mixed                          | n = 1                              | 7/135        | 5.19 (2.49 to 10.48) | NA                     |                       |        |       |

|                          |                         |                  |        |           |                        |                        |        |
|--------------------------|-------------------------|------------------|--------|-----------|------------------------|------------------------|--------|
| Other                    | Hair loss               | Mixed            | n = 1  | 12/379    | 3.17 (1.81 to 5.49)    | NA                     | <0.001 |
|                          |                         | Hospitalised     | n = 4  | 541/2335  | 23.54 (17.68 to 30.61) | 74.84                  |        |
|                          |                         | Non-hospitalised | n = 1  | 10/ 96    | 10.42 (5.70 to 18.29)  | NA                     |        |
|                          | Skin rash               | Hospitalised     | n = 3  | 60/1923   | 3.53 (0.75 to 15.11)   | 82.97                  | 0.112  |
|                          |                         | Non-hospitalised | n = 1  | 7/451     | 1.55 (0.74 to 3.22)    | NA                     |        |
| Psychological and social | Anxiety                 | Hospitalised     | n = 4  | 524/2423  | 25.58 (6.36 to 63.49)  | 97.85                  | 0.072  |
|                          |                         | Mixed            | n = 3  | 126/1128  | 11.60 (6.03 to 21.15)  | 72                     |        |
|                          | Care dependency         | Hospitalised     | n = 1  | 25/1611   | 1.55 (1.05 to 2.29)    | NA                     | <0.001 |
|                          |                         | Mixed            | n = 2  | 135/944   | 12.00 (0.39 to 82.45)  | 85.63                  |        |
|                          | Depression              | Mixed            | n = 4  | 95/1507   | 6.80 (3.99 to 11.37)   | 71                     | 0.506  |
|                          |                         | Hospitalised     | n = 2  | 390/2155  | 10.38 (0.00 to 99.83)  | 98.62                  |        |
|                          | Low mood/ Dysphoria     | Mixed            | n = 1  | 0/226     | 0.00 (0.00 to 100.00)  | NA                     | 1.000  |
|                          |                         | Hospitalised     | n = 2  | 62/672    | 9.49 (0.00 to 100.00)  | 98.92                  |        |
|                          | PTSD                    | Hospitalised     | n = 3  | 59/474    | 10.52 (3.06 to 30.44)  | 80.04                  | 0.458  |
|                          |                         | Non-hospitalised | n = 1  | 32/455    | 7.03 (5.02 to 9.78)    | NA                     |        |
|                          |                         | Mixed            | n = 3  | 238/1128  | 8.73 (0.46 to 66.23)   | 96.63                  |        |
|                          | Reduced quality of life | Mixed            | n = 2  | 81/267    | 30.34 (7.43 to 70.27)  | 0                      | <0.001 |
|                          |                         | Hospitalised     | n = 1  | 259/540   | 47.96 (43.77 to 52.18) | NA                     |        |
|                          | Sleep disorder          | Mixed            | n = 4  | 100/885   | 10.66 (1.76 to 44.22)  | 96.51                  | 0.081  |
|                          |                         | Hospitalised     | n = 5  | 642/2557  | 25.81 (18.85 to 34.26) | 84.7                   |        |
| Systemic                 | Dizziness               | Mixed            | n = 2  | 18/514    | 3.78 (0.03 to 83.74)   | 79.93                  | 0.224  |
|                          |                         | Non-hospitalised | n = 1  | 29/434    | 6.68 (4.68 to 9.45)    | NA                     |        |
|                          | Fatigue                 | Hospitalised     | n = 2  | 115/2193  | 4.21 (0.08 to 71.53)   | 89.39                  | 0.017  |
|                          |                         | Hospitalised     | n = 11 | 1762/4147 | 37.10 (26.54 to 49.06) | 98.23                  |        |
|                          |                         | Non-hospitalised | n = 4  | 200/813   | 24.60 (20.11 to 29.72) | 0                      |        |
|                          | Fever                   | Mixed            | n = 3  | 245/1079  | 21.04 (10.48 to 37.75) | 79.86                  | 0.661  |
|                          |                         | Hospitalised     | n = 4  | 17/1876   | 0.85 (0.02 to 24.20)   | 92.05                  |        |
|                          |                         | Non-hospitalised | n = 3  | 25/981    | 1.41 (0.06 to 24.82)   | 84.73                  |        |
|                          | Sweat or night sweats   | Mixed            | n = 1  | 5/767     | 0.65 (0.27 to 1.56)    | NA                     | 0.894  |
|                          |                         | Hospitalised     | n = 1  | 35/145    | 24.14 (17.87 to 31.76) | NA                     |        |
|                          | Weakness                | Hospitalised     | n = 1  | 127/538   | 23.61 (20.21 to 27.38) | NA                     | <0.001 |
|                          |                         | Weakness         | Mixed  | n = 1     | 113/379                | 29.82 (25.42 to 34.61) | NA     |

|                   |                            |                  |       |          |                        |       |        |
|-------------------|----------------------------|------------------|-------|----------|------------------------|-------|--------|
|                   |                            | Hospitalised     | n = 1 | 73/134   | 54.48 (46.00 to 62.70) | NA    |        |
|                   | Nasal congestion           | Non-hospitalised | n = 3 | 49/981   | 4.99 (2.72 to 8.99)    | 0     | 0.924  |
|                   |                            | Hospitalised     | n = 1 | 1/ 22    | 4.55 (0.64 to 26.15)   | NA    |        |
| Upper respiratory | Other respiratory symptoms | Hospitalised     | n = 2 | 240/660  | 32.43 (2.22 to 91.02)  | 88.57 | <0.001 |
|                   |                            | Non-hospitalised | n = 1 | 13/451   | 2.88 (1.68 to 4.90)    | NA    |        |
|                   | Sore throat                | Hospitalised     | n = 4 | 103/2349 | 4.81 (1.60 to 13.60)   | 85.83 | 0.815  |
|                   |                            | Non-hospitalised | n = 2 | 24/547   | 4.39 (0.32 to 39.44)   | 0     |        |

## Supplement 6: Subgroup analysis: Setting

| Classification         | Symptom                             | Subgroup          | N Studies     | Event/total | Proportion% (95% CIs)  | Heterogeneity (%)     | P value |
|------------------------|-------------------------------------|-------------------|---------------|-------------|------------------------|-----------------------|---------|
| Cardiopulmonary        | Cough                               | Multicentre       | n = 5         | 121/1358    | 6.90 (2.46 to 17.92)   | 84.05                 | 0.842   |
|                        |                                     | Single-centre     | n = 10        | 260/3239    | 9.07 (4.23 to 18.41)   | 95.62                 |         |
|                        |                                     | Online survey     | n = 1         | 33/ 434     | 7.60 (5.46 to 10.50)   | NA                    |         |
|                        | Chest pain                          | Single-centre     | n = 10        | 292/4760    | 5.87 (2.70 to 12.26)   | 93.7                  | 0.039   |
|                        |                                     | Multicentre       | n = 1         | 16/ 118     | 13.56 (8.48 to 20.99)  | NA                    |         |
|                        | Breathlessness/ Exertional dyspnoea | Multicentre       | n = 6         | 350/1437    | 26.79 (15.81 to 41.63) | 91.82                 | <0.001  |
|                        |                                     | Single-centre     | n = 12        | 889/3549    | 27.78 (17.16 to 41.67) | 96.93                 |         |
|                        |                                     | Online survey     | n = 2         | 58/ 537     | 10.80 (2.03 to 41.47)  | 16.75                 |         |
|                        | Palpitations                        | Single-centre     | n = 6         | 359/4120    | 9.02 (5.17 to 15.27)   | 90.72                 | 0.571   |
|                        |                                     | Multicentre       | n = 2         | 117/ 658    | 11.96 (0.02 to 98.84)  | 91.67                 |         |
|                        | Excessive sputum/ Expectoration     | Multicentre       | n = 3         | 81/1105     | 6.97 (2.02 to 21.38)   | 86.45                 | 0.066   |
|                        |                                     | Single-centre     | n = 3         | 32/ 844     | 3.79 (1.78 to 7.88)    | 24.53                 |         |
| Gastrointestinal       | Weight loss                         | Online survey     | n = 1         | 47/ 434     | 10.83 (8.23 to 14.12)  | NA                    | <0.001  |
|                        |                                     | Single-centre     | n = 1         | 50/ 134     | 37.31 (29.55 to 45.79) | NA                    |         |
|                        | Stomach/ Abdominal pain             | Single-centre     | n = 2         | 7/ 859      | 0.81 (0.01 to 50.51)   | 52.12                 | <0.001  |
|                        |                                     | Multicentre       | n = 2         | 23/ 568     | 4.05 (0.28 to 38.69)   | 64.62                 |         |
|                        | Loss of appetite                    | Single-centre     | n = 2         | 174/1789    | 15.09 (0.03 to 98.93)  | 97.64                 | 0.288   |
|                        |                                     | Multicentre       | n = 1         | 28/ 117     | 23.93 (17.06 to 32.48) | NA                    |         |
|                        | Diarrhoea                           | Single-centre     | n = 4         | 85/2130     | 1.81 (0.36 to 8.72)    | 72.7                  | 0.081   |
|                        |                                     | Multicentre       | n = 5         | 80/1361     | 6.23 (2.49 to 14.76)   | 85.33                 |         |
|                        |                                     | Online survey     | n = 1         | 25/ 434     | 5.76 (3.92 to 8.39)    | NA                    |         |
|                        | Musculoskeletal                     | Impaired mobility | Single-centre | n = 4       | 294/2191               | 23.71 (6.53 to 58.01) | 98.62   |
| Multicentre            |                                     |                   | n = 2         | 29/ 675     | 4.30 (0.40 to 33.37)   | 0                     |         |
| Joint pain/ Arthralgia |                                     | Single-centre     | n = 7         | 264/2969    | 8.03 (4.64 to 13.55)   | 86.94                 | 0.116   |
|                        |                                     | Multicentre       | n = 2         | 173/ 991    | 15.45 (0.11 to 96.89)  | 97.19                 |         |
| Muscle pain/ Myalgia   |                                     | Multicentre       | n = 4         | 103/ 839    | 13.72 (6.26 to 27.48)  | 89.49                 | 0.508   |
| Neurocognitive         | Other cognitive impairment          | Single-centre     | n = 2         | 118/ 264    | 40.19 (0.00 to 100.00) | 99                    | 0.017   |
|                        |                                     | Multicentre       | n = 1         | 4/ 177      | 2.26 (0.85 to 5.86)    | NA                    |         |

|                                |                                    |               |          |                       |                        |       |        |
|--------------------------------|------------------------------------|---------------|----------|-----------------------|------------------------|-------|--------|
| Neurological and neuromuscular | Confusion                          | Multicentre   | n = 1    | 10/ 451               | 2.22 (1.20 to 4.07)    | NA    | 0.419  |
|                                |                                    | Single-centre | n = 1    | 23/ 767               | 3.00 (2.00 to 4.47)    | NA    |        |
|                                | Memory impairment                  | Multicentre   | n = 2    | 50/ 253               | 19.76 (3.21 to 64.68)  | 8.97  | 0.821  |
|                                |                                    | Single-centre | n = 3    | 101/ 633              | 16.93 (0.58 to 87.62)  | 97.39 |        |
|                                | Walking/ Gait abnormality          | Multicentre   | n = 2    | 29/ 675               | 4.30 (0.40 to 33.37)   | 0     | 0.766  |
|                                |                                    | Single-centre | n = 1    | 5/ 134                | 3.73 (1.56 to 8.65)    | NA    |        |
|                                | Tremors                            | Multicentre   | n = 2    | 17/ 586               | 2.98 (0.00 to 99.96)   | 94.5  | 0.615  |
|                                |                                    | Single-centre | n = 1    | 25/ 538               | 4.65 (3.16 to 6.79)    | NA    |        |
|                                | Headache                           | Single-centre | n = 6    | 95/3217               | 2.82 (0.69 to 10.88)   | 96.4  | <0.001 |
|                                |                                    | Multicentre   | n = 4    | 65/ 884               | 7.35 (5.00 to 10.68)   | 37.26 |        |
|                                | Smell disturbance                  | Online survey | n = 1    | 67/ 434               | 15.44 (12.34 to 19.15) | NA    | 0.235  |
|                                |                                    | Multicentre   | n = 6    | 197/1196              | 17.21 (13.03 to 22.38) | 68.78 |        |
|                                |                                    | Single-centre | n = 11   | 443/3935              | 12.49 (7.13 to 20.97)  | 95.97 |        |
|                                | Taste disturbance                  | Online survey | n = 2    | 202/ 537              | 27.06 (0.04 to 99.70)  | 96.07 | 0.793  |
|                                |                                    | Single-centre | n = 10   | 383/3825              | 12.21 (6.16 to 22.76)  | 97.3  |        |
|                                | Tingling/ Paraesthesia             | Multicentre   | n = 5    | 143/1061              | 14.27 (10.13 to 19.73) | 65.8  | <0.001 |
|                                |                                    | Online survey | n = 2    | 161/ 537              | 18.21 (0.00 to 99.91)  | 95.82 |        |
|                                | Decreased sensation or sensibility | Single-centre | n = 1    | 4/ 122                | 3.28 (1.24 to 8.41)    | NA    | 0.060  |
|                                |                                    | Multicentre   | n = 1    | 29/ 135               | 21.48 (15.36 to 29.21) | NA    |        |
|                                | Hair loss                          | Multicentre   | n = 1    | 20/ 135               | 14.81 (9.76 to 21.85)  | NA    | 0.630  |
| Single-centre                  |                                    | n = 1         | 10/ 134  | 7.46 (4.06 to 13.31)  | NA                     |       |        |
| Skin rash                      | Multicentre                        | n = 1         | 14/ 118  | 11.86 (7.15 to 19.04) | NA                     | 0.112 |        |
|                                | Single-centre                      | n = 4         | 549/2692 | 14.99 (3.66 to 45.01) | 95.58                  |       |        |
| Care dependency                | Single-centre                      | n = 3         | 60/1923  | 3.53 (0.75 to 15.11)  | 82.97                  | 0.621 |        |
|                                | Multicentre                        | n = 1         | 7/ 451   | 1.55 (0.74 to 3.22)   | NA                     |       |        |
| PTSD                           | Single-centre                      | n = 2         | 146/2378 | 5.16 (0.00 to 99.97)  | 99.18                  | 0.653 |        |
|                                | Multicentre                        | n = 1         | 14/ 177  | 7.91 (4.74 to 12.91)  | NA                     |       |        |
| Sleep disorder                 | Multicentre                        | n = 2         | 54/ 706  | 7.65 (1.35 to 33.36)  | 0                      | 0.119 |        |
|                                | Single-centre                      | n = 4         | 275/1351 | 9.73 (1.74 to 39.56)  | 95.56                  |       |        |
| Depression                     | Single-centre                      | n = 7         | 665/3162 | 15.96 (6.78 to 33.15) | 95.15                  | 0.979 |        |
|                                | Multicentre                        | n = 2         | 77/ 280  | 27.41 (2.84 to 82.98) | 77.28                  |       |        |
| Depression                     | Single-centre                      | n = 5         | 474/3527 | 8.06 (3.47 to 17.62)  | 97.89                  |       |        |

|                   |                            |               |        |           |                        |       |        |
|-------------------|----------------------------|---------------|--------|-----------|------------------------|-------|--------|
|                   |                            | Multicentre   | n = 1  | 11/ 135   | 8.15 (4.57 to 14.11)   | NA    |        |
|                   | Anxiety                    | Single-centre | n = 6  | 626/3416  | 18.92 (7.55 to 40.00)  | 97.66 | 0.870  |
|                   |                            | Multicentre   | n = 1  | 24/ 135   | 17.78 (12.21 to 25.16) | NA    |        |
|                   | Dizziness                  | Single-centre | n = 3  | 124/2572  | 3.55 (1.05 to 11.30)   | 87.17 |        |
|                   |                            | Online survey | n = 1  | 29/ 434   | 6.68 (4.68 to 9.45)    | NA    | 0.138  |
|                   |                            | Multicentre   | n = 1  | 9/ 135    | 6.67 (3.50 to 12.32)   | NA    |        |
|                   | Sweat or night sweats      | Multicentre   | n = 1  | 35/ 145   | 24.14 (17.87 to 31.76) | NA    | 0.894  |
|                   |                            | Single-centre | n = 1  | 127/ 538  | 23.61 (20.21 to 27.38) | NA    |        |
| Systemic          | Fever                      | Single-centre | n = 4  | 22/2621   | 0.98 (0.06 to 14.94)   | 94.58 |        |
|                   |                            | Online survey | n = 1  | 22/ 434   | 5.07 (3.36 to 7.58)    | NA    | <0.001 |
|                   |                            | Multicentre   | n = 2  | 3/ 569    | 0.53 (0.00 to 89.24)   | 0     |        |
|                   | Fatigue                    | Single-centre | n = 10 | 1781/4352 | 36.55 (25.00 to 49.88) | 98.57 |        |
|                   |                            | Multicentre   | n = 5  | 297/1150  | 24.28 (17.14 to 33.19) | 78.24 | 0.067  |
|                   |                            | Online survey | n = 2  | 129/ 537  | 24.02 (8.05 to 53.30)  | 0     |        |
|                   | Other respiratory symptoms | Single-centre | n = 2  | 240/ 660  | 32.43 (2.22 to 91.02)  | 88.57 | <0.001 |
|                   |                            | Multicentre   | n = 1  | 13/ 451   | 2.88 (1.68 to 4.90)    | NA    |        |
| Upper respiratory | Nasal congestion           | Online survey | n = 1  | 23/ 434   | 5.30 (3.55 to 7.85)    | NA    | 0.690  |
|                   |                            | Multicentre   | n = 2  | 27/ 569   | 4.75 (0.41 to 37.90)   | 25.27 |        |
|                   | Sore throat                | Single-centre | n = 3  | 103/2327  | 5.38 (1.20 to 20.94)   | 90.55 | 0.538  |
|                   |                            | Multicentre   | n = 2  | 24/ 569   | 4.22 (0.31 to 38.40)   | 0.31  |        |

## Supplement 7: Subgroup analysis: Continents

| Classification                  | Symptom                             | Subgroup      | N Studies | Event/total          | Proportion% (95% CIs)  | Heterogeneity (%) | P value |
|---------------------------------|-------------------------------------|---------------|-----------|----------------------|------------------------|-------------------|---------|
| Cardiopulmonary                 | Cough                               | Europe        | n = 11    | 267/3074             | 9.71 (4.88 to 18.39)   | 94.92             | 0.057   |
|                                 |                                     | Asia          | n = 4     | 146/1839             | 7.64 (4.60 to 12.44)   | 79.54             |         |
|                                 |                                     | North America | n = 1     | 1/ 118               | 0.85 (0.12 to 5.77)    | NA                |         |
|                                 | Chest pain                          | Asia          | n = 3     | 157/2840             | 4.11 (0.23 to 44.11)   | 97.52             | 0.097   |
|                                 |                                     | Europe        | n = 7     | 135/1920             | 6.93 (2.77 to 16.31)   | 89.56             |         |
|                                 |                                     | North America | n = 1     | 16/ 118              | 13.56 (8.48 to 20.99)  | NA                |         |
|                                 | Breathlessness/ Exertional dyspnoea | Europe        | n = 13    | 868/3336             | 28.59 (18.52 to 41.35) | 96.32             | 0.227   |
|                                 |                                     | Asia          | n = 4     | 328/1839             | 16.53 (7.91 to 31.34)  | 95.25             |         |
|                                 |                                     | Middle East   | n = 2     | 70/ 230              | 22.35 (0.00 to 99.99)  | 97.16             |         |
|                                 | Other cardiovascular symptoms       | North America | n = 1     | 31/ 118              | 26.27 (19.13 to 34.93) | NA                | 0.009   |
|                                 |                                     | Europe        | n = 1     | 1/ 767               | 0.13 (0.02 to 0.92)    | NA                |         |
|                                 |                                     | Asia          | n = 2     | 78/1185              | 4.20 (0.00 to 99.97)   | 97.68             |         |
|                                 | Palpitations                        | Asia          | n = 4     | 387/3380             | 12.04 (7.03 to 19.85)  | 93.93             | 0.168   |
|                                 |                                     | Europe        | n = 3     | 82/1280              | 8.10 (1.14 to 40.21)   | 95.9              |         |
|                                 |                                     | North America | n = 1     | 7/ 118               | 5.93 (2.85 to 11.92)   | NA                |         |
| Excessive sputum/ Expectoration | Asia                                | n = 3         | 81/1192   | 6.56 (1.54 to 23.96) | 90.08                  | 0.238             |         |
|                                 | Europe                              | n = 3         | 32/ 757   | 4.23 (1.99 to 8.76)  | 0                      |                   |         |
| Gastrointestinal                | Stomach/ Abdominal pain             | Europe        | n = 3     | 22/1310              | 1.61 (0.22 to 10.84)   | 80.31             | 0.011   |
|                                 |                                     | Asia          | n = 1     | 8/ 117               | 6.84 (3.46 to 13.08)   | NA                |         |
|                                 | Loss of appetite                    | Asia          | n = 2     | 166/1772             | 13.98 (0.06 to 97.66)  | 96.44             | 0.088   |
|                                 |                                     | Europe        | n = 1     | 36/ 134              | 26.87 (20.05 to 34.99) | NA                |         |
|                                 | Diarrhoea                           | Europe        | n = 6     | 49/1495              | 2.37 (0.80 to 6.77)    | 80.93             | 0.055   |
|                                 |                                     | Asia          | n = 3     | 133/2312             | 7.38 (2.34 to 20.91)   | 89.09             |         |
|                                 |                                     | North America | n = 1     | 8/ 118               | 6.78 (3.43 to 12.97)   | NA                |         |
|                                 | Nausea or Vomiting                  | Europe        | n = 2     | 20/ 586              | 3.92 (0.00 to 98.84)   | 92.31             | 0.004   |
|                                 |                                     | Asia          | n = 1     | 21/ 117              | 17.95 (12.00 to 25.97) | NA                |         |
|                                 |                                     | North America | n = 1     | 8/ 118               | 6.78 (3.43 to 12.97)   | NA                |         |
| Musculoskeletal                 | Impaired mobility                   | Asia          | n = 2     | 135/2162             | 5.63 (0.46 to 43.57)   | 82.31             | <0.001  |
|                                 |                                     | Europe        | n = 3     | 126/ 577             | 16.90 (2.10 to 65.88)  | 92.96             |         |

|                                |                            |               |          |                       |                        |       |        |
|--------------------------------|----------------------------|---------------|----------|-----------------------|------------------------|-------|--------|
|                                |                            | Middle East   | n = 1    | 62/ 127               | 48.82 (40.25 to 57.46) | NA    |        |
|                                | Joint pain/ Arthralgia     | Asia          | n = 3    | 326/2733              | 12.25 (3.07 to 38.13)  | 97.8  | 0.295  |
|                                |                            | Europe        | n = 6    | 111/1227              | 8.03 (4.01 to 15.42)   | 88.36 |        |
|                                |                            | Europe        | n = 9    | 294/2471              | 14.02 (7.27 to 25.34)  | 96.38 |        |
|                                | Muscle pain/ Myalgia       | Asia          | n = 2    | 63/2193               | 3.11 (0.16 to 38.54)   | 83.96 | <0.001 |
|                                |                            | North America | n = 1    | 21/ 118               | 17.80 (11.90 to 25.76) | NA    |        |
|                                |                            | Europe        | n = 2    | 118/ 264              | 40.19 (0.00 to 100.00) | 99    |        |
| Neurocognitive                 | Other cognitive impairment | North America | n = 1    | 4/ 177                | 2.26 (0.85 to 5.86)    | NA    | 0.017  |
|                                |                            | North America | n = 1    | 20/ 118               | 16.95 (11.20 to 24.82) | NA    |        |
|                                | Memory impairment          | Europe        | n = 4    | 131/ 768              | 18.19 (3.02 to 61.38)  | 96.14 | 0.898  |
|                                | Walking/ Gait abnormality  | Europe        | n = 2    | 12/ 269               | 4.46 (0.11 to 66.56)   | 0     | 0.796  |
|                                |                            | Asia          | n = 1    | 22/ 540               | 4.07 (2.70 to 6.11)    | NA    |        |
|                                | Tremors                    | Europe        | n = 2    | 17/ 586               | 2.98 (0.00 to 99.96)   | 94.5  | 0.615  |
|                                |                            | Asia          | n = 1    | 25/ 538               | 4.65 (3.16 to 6.79)    | NA    |        |
|                                | Headache                   | Asia          | n = 1    | 33/1655               | 1.99 (1.42 to 2.79)    | NA    | 0.005  |
|                                |                            | Europe        | n = 9    | 187/2762              | 5.30 (2.12 to 12.66)   | 92.94 |        |
|                                |                            | North America | n = 1    | 7/ 118                | 5.93 (2.85 to 11.92)   | NA    |        |
| Neurological and neuromuscular | Smell disturbance          | Europe        | n = 15   | 602/3615              | 15.35 (9.88 to 23.06)  | 96.43 | 0.027  |
|                                |                            | Asia          | n = 1    | 176/1655              | 10.63 (9.24 to 12.21)  | NA    |        |
|                                |                            | North America | n = 2    | 49/ 295               | 16.74 (1.75 to 69.42)  | 65.9  |        |
|                                | Taste disturbance          | Middle East   | n = 1    | 15/ 103               | 14.56 (8.97 to 22.76)  | NA    | <0.001 |
|                                |                            | Asia          | n = 1    | 120/1655              | 7.25 (6.10 to 8.60)    | NA    |        |
| Europe                         |                            | n = 13        | 510/3370 | 14.25 (8.44 to 23.06) | 96.81                  |       |        |
|                                | Hair loss                  | North America | n = 2    | 49/ 295               | 16.74 (1.75 to 69.42)  | 65.9  | 0.005  |
|                                |                            | Middle East   | n = 1    | 8/ 103                | 7.77 (3.93 to 14.77)   | NA    |        |
| Other                          | Skin rash                  | North America | n = 1    | 14/ 118               | 11.86 (7.15 to 19.04)  | NA    | 0.952  |
|                                |                            | Asia          | n = 2    | 513/2193              | 24.69 (5.86 to 63.32)  | 90.76 |        |
|                                |                            | Europe        | n = 2    | 36/ 499               | 8.21 (0.00 to 99.89)   | 96.66 |        |
|                                | Care dependency            | Asia          | n = 1    | 47/1655               | 2.84 (2.14 to 3.76)    | NA    | <0.001 |
|                                |                            | Europe        | n = 3    | 20/ 719               | 2.75 (0.30 to 20.89)   | 86.08 |        |
| Psychosological and social     | Care dependency            | Asia          | n = 1    | 25/1611               | 1.55 (1.05 to 2.29)    | NA    | <0.001 |
|                                |                            | North America | n = 1    | 14/ 177               | 7.91 (4.74 to 12.91)   | NA    |        |



|                            |               |       |           |                        |       |        |
|----------------------------|---------------|-------|-----------|------------------------|-------|--------|
|                            | Europe        | n = 1 | 121/ 767  | 15.78 (13.36 to 18.53) | NA    |        |
|                            | Europe        | n = 1 | 28/90     | 31.11 (22.42 to 41.37) | NA    |        |
| Reduced quality of life    | North America | n = 1 | 53/ 177   | 29.94 (23.66 to 37.09) | NA    | <0.001 |
|                            | Asia          | n = 1 | 259/ 540  | 47.96 (43.77 to 52.18) | NA    |        |
| Low mood/ Dysphoria        | Europe        | n = 2 | 53/ 360   | 0.86 (0.00 to 100.00)  | 0     | 0.868  |
|                            | Asia          | n = 1 | 9/ 538    | 1.67 (0.87 to 3.18)    | NA    |        |
| PTSD                       | Europe        | n = 5 | 322/1937  | 9.93 (3.21 to 26.84)   | 96.87 | 0.322  |
|                            | Middle East   | n = 1 | 7/ 120    | 5.83 (2.81 to 11.73)   | NA    |        |
| Sleep disorder             | Asia          | n = 2 | 532/2193  | 22.00 (2.69 to 74.18)  | 94    | 0.486  |
|                            | Europe        | n = 7 | 210/1249  | 17.09 (7.01 to 36.03)  | 94.68 |        |
| Depression                 | Asia          | n = 2 | 390/2155  | 10.38 (0.00 to 99.83)  | 98.62 | 0.506  |
|                            | Europe        | n = 4 | 95/1507   | 6.80 (3.99 to 11.37)   | 71    |        |
| Anxiety                    | Asia          | n = 2 | 402/2155  | 12.63 (0.02 to 98.99)  | 98.36 | 0.320  |
|                            | Europe        | n = 5 | 248/1396  | 21.85 (8.03 to 47.22)  | 97.39 |        |
| Dizziness                  | Asia          | n = 2 | 115/2193  | 4.21 (0.08 to 71.53)   | 89.39 | 0.764  |
|                            | Europe        | n = 3 | 47/ 948   | 4.76 (1.43 to 14.71)   | 75.61 |        |
| General malaise            | Europe        | n = 1 | 25/ 134   | 18.66 (12.93 to 26.16) | NA    | <0.001 |
|                            | Asia          | n = 1 | 267/ 538  | 49.63 (45.42 to 53.85) | NA    |        |
| Sweat or night sweats      | Europe        | n = 1 | 35/ 145   | 24.14 (17.87 to 31.76) | NA    | 0.894  |
|                            | Asia          | n = 1 | 127/ 538  | 23.61 (20.21 to 27.38) | NA    |        |
| Fever                      | Europe        | n = 5 | 44/1851   | 1.91 (0.36 to 9.62)    | 90.51 |        |
|                            | Asia          | n = 1 | 2/1655    | 0.12 (0.03 to 0.48)    | NA    | 0.011  |
|                            | North America | n = 1 | 1/ 118    | 0.85 (0.12 to 5.77)    | NA    |        |
| Fatigue                    | Europe        | n = 8 | 605/2014  | 34.68 (25.12 to 45.66) | 93    |        |
|                            | North America | n = 2 | 60/ 295   | 20.71 (0.25 to 96.48)  | 91.68 | 0.382  |
|                            | Asia          | n = 4 | 1436/3380 | 31.33 (10.49 to 63.98) | 99.42 |        |
|                            | Middle East   | n = 3 | 106/ 350  | 28.07 (6.94 to 67.15)  | 93.59 |        |
| Other respiratory symptoms | Europe        | n = 2 | 43/ 573   | 8.88 (0.00 to 99.98)   | 97.85 | 0.029  |
|                            | Asia          | n = 1 | 210/ 538  | 39.03 (35.00 to 43.22) | NA    |        |
| Nasal congestion           | Europe        | n = 2 | 42/ 885   | 4.75 (0.66 to 27.08)   | 0     | 0.343  |
|                            | North America | n = 1 | 8/ 118    | 6.78 (3.43 to 12.97)   | NA    |        |
| Sore throat                | Asia          | n = 2 | 86/2193   | 3.92 (1.00 to 14.17)   | 8.33  | 0.165  |

---

|               |       |         |                      |       |
|---------------|-------|---------|----------------------|-------|
| Europe        | n = 2 | 38/ 585 | 7.48 (0.06 to 91.61) | 90.13 |
| North America | n = 1 | 3/ 118  | 2.54 (0.82 to 7.59)  | NA    |

---

## Supplement 8: Subgroup analysis: Follow-up timing

| Classification                 | Symptom                             | Subgroup   | N Studies | Event/total | Proportion% (95% CIs)  | Heterogeneity (%) | P value |
|--------------------------------|-------------------------------------|------------|-----------|-------------|------------------------|-------------------|---------|
| Cardiopulmonary                | Cough                               | < 4 months | n = 14    | 374/4483    | 8.35 (4.56 to 14.81)   | 94.34             | 0.669   |
|                                |                                     | > 4 months | n = 2     | 40/548      | 7.30 (0.97 to 38.82)   | 0                 |         |
|                                | Chest pain                          | > 4 months | n = 1     | 75/1655     | 4.53 (3.63 to 5.65)    | NA                | 0.311   |
|                                |                                     | < 4 months | n = 10    | 233/3223    | 6.55 (2.97 to 13.84)   | 91.52             |         |
|                                | Breathlessness/ Exertional dyspnoea | < 4 months | n = 15    | 1142/4562   | 28.92 (20.29 to 39.41) | 96.15             | 0.075   |
|                                |                                     | > 4 months | n = 5     | 155/961     | 15.41 (5.74 to 35.30)  | 95.81             |         |
|                                | Palpitations                        | > 4 months | n = 1     | 154/1655    | 9.31 (8.00 to 10.80)   | NA                | 0.863   |
|                                |                                     | < 4 months | n = 7     | 322/3123    | 9.71 (5.42 to 16.78)   | 94.42             |         |
|                                | Excessive sputum/ Expectoration     | > 4 months | n = 1     | 11/114      | 9.65 (5.42 to 16.59)   | NA                | 0.069   |
|                                |                                     | < 4 months | n = 5     | 102/1835    | 4.95 (2.64 to 9.09)    | 85.74             |         |
| Gastrointestinal               | Weight loss                         | > 4 months | n = 1     | 47/434      | 10.83 (8.23 to 14.12)  | NA                | <0.001  |
|                                |                                     | < 4 months | n = 1     | 50/134      | 37.31 (29.55 to 45.79) | NA                |         |
|                                | Loss of appetite                    | > 4 months | n = 1     | 138/1655    | 8.34 (7.10 to 9.77)    | NA                | <0.001  |
|                                |                                     | < 4 months | n = 2     | 64/251      | 25.50 (5.15 to 68.31)  | 0                 |         |
|                                | Diarrhoea                           | < 4 months | n = 8     | 85/1836     | 3.53 (1.41 to 8.59)    | 84.4              | 0.371   |
|                                |                                     | > 4 months | n = 2     | 105/2089    | 5.03 (1.46 to 15.89)   | 0                 |         |
| Musculoskeletal                | Impaired mobility                   | > 4 months | n = 3     | 241/1953    | 24.29 (2.15 to 82.41)  | 99.05             | 0.108   |
|                                |                                     | < 4 months | n = 3     | 82/913      | 8.07 (0.95 to 44.49)   | 96.49             |         |
|                                | Joint pain/ Arthralgia              | > 4 months | n = 1     | 154/1655    | 9.31 (8.00 to 10.80)   | NA                | 0.986   |
|                                |                                     | < 4 months | n = 8     | 283/2305    | 9.35 (5.22 to 16.17)   | 94.04             |         |
|                                | Muscle pain/ Myalgia                | < 4 months | n = 11    | 339/3127    | 12.95 (7.31 to 21.91)  | 96.15             | <0.001  |
|                                |                                     | > 4 months | n = 1     | 39/1655     | 2.36 (1.73 to 3.21)    | NA                |         |
| Neurocognitive                 | Other cognitive impairment          | < 4 months | n = 2     | 118/264     | 40.19 (0.00 to 100.00) | 99                | 0.017   |
|                                |                                     | > 4 months | n = 1     | 4/177       | 2.26 (0.85 to 5.86)    | NA                |         |
| Neurological and neuromuscular | Headache                            | > 4 months | n = 3     | 113/2269    | 6.11 (0.65 to 39.33)   | 97.98             | 0.620   |
|                                |                                     | < 4 months | n = 8     | 114/2266    | 4.42 (1.60 to 11.59)   | 92.68             |         |
|                                | Smell disturbance                   | < 4 months | n = 13    | 367/2994    | 13.26 (8.37 to 20.37)  | 94.8              | 0.166   |
|                                |                                     | > 4 months | n = 6     | 475/2674    | 19.96 (11.27 to 32.87) | 97.79             |         |
|                                | Taste disturbance                   | > 4 months | n = 6     | 364/2674    | 15.36 (7.94 to 27.63)  | 97.61             | 0.580   |

|                          |                         |            |           |                        |                        |       |        |
|--------------------------|-------------------------|------------|-----------|------------------------|------------------------|-------|--------|
|                          |                         | < 4 months | n = 11    | 323/2749               | 12.61 (6.95 to 21.81)  | 96.44 |        |
| Other                    | Hair loss               | < 4 months | n = 4     | 204/1155               | 12.72 (3.10 to 39.89)  | 95.98 | 0.181  |
|                          |                         | > 4 months | n = 1     | 359/1655               | 21.69 (19.77 to 23.74) | NA    |        |
|                          | Skin rash               | > 4 months | n = 1     | 47/1655                | 2.84 (2.14 to 3.76)    | NA    | 0.952  |
|                          |                         | < 4 months | n = 3     | 20/719                 | 2.75 (0.30 to 20.89)   | 86.08 |        |
| Psychological and social | Care dependency         | > 4 months | n = 2     | 39/1788                | 3.38 (0.00 to 98.56)   | 95.89 | 0.006  |
|                          |                         | < 4 months | n = 1     | 121/767                | 15.78 (13.36 to 18.53) | NA    |        |
|                          | Reduced quality of life | < 4 months | n = 2     | 287/630                | 40.64 (2.65 to 94.52)  | 88.36 | 0.119  |
|                          |                         | > 4 months | n = 1     | 53/177                 | 29.94 (23.66 to 37.09) | NA    |        |
|                          | PTSD                    | < 4 months | n = 5     | 322/1937               | 9.93 (3.21 to 26.84)   | 96.87 | 0.322  |
|                          |                         | > 4 months | n = 1     | 7/120                  | 5.83 (2.81 to 11.73)   | NA    |        |
|                          | Sleep disorder          | > 4 months | n = 1     | 437/1655               | 26.40 (24.34 to 28.58) | NA    | 0.130  |
|                          |                         | < 4 months | n = 8     | 305/1787               | 17.20 (8.21 to 32.54)  | 94.08 |        |
|                          | Depression              | > 4 months | n = 1     | 367/1617               | 22.70 (20.72 to 24.80) | NA    | <0.001 |
|                          |                         | < 4 months | n = 5     | 118/2045               | 6.16 (3.99 to 9.40)    | 71.69 |        |
| Anxiety                  | > 4 months              | n = 1      | 367/1617  | 22.70 (20.72 to 24.80) | NA                     | 0.492 |        |
|                          | < 4 months              | n = 6      | 283/1934  | 18.10 (7.16 to 38.77)  | 97.51                  |       |        |
| Systemic                 | Dizziness               | > 4 months | n = 2     | 130/2089               | 6.22 (2.06 to 17.34)   | 0     | 0.011  |
|                          |                         | < 4 months | n = 3     | 32/1052                | 3.20 (1.08 to 9.12)    | 68.78 |        |
|                          | Fever                   | < 4 months | n = 5     | 23/1535                | 1.26 (0.22 to 7.01)    | 90.73 | 0.762  |
|                          |                         | > 4 months | n = 2     | 24/2089                | 0.79 (0.00 to 100.00)  | 96.18 |        |
| Fatigue                  | < 4 months              | n = 10     | 890/3243  | 32.50 (23.93 to 42.42) | 94.57                  | 0.608 |        |
|                          | > 4 months              | n = 7      | 1317/2796 | 28.61 (16.00 to 45.73) | 98.47                  |       |        |
| Upper respiratory        | Nasal congestion        | > 4 months | n = 1     | 23/434                 | 5.30 (3.55 to 7.85)    | NA    | 0.690  |
|                          |                         | < 4 months | n = 2     | 27/569                 | 4.75 (0.41 to 37.90)   | 25.27 |        |
|                          | Sore throat             | > 4 months | n = 1     | 69/1655                | 4.17 (3.31 to 5.25)    | NA    | 0.655  |
|                          |                         | < 4 months | n = 4     | 58/1241                | 4.84 (1.76 to 12.65)   | 85.28 |        |

## Supplement 9: Meta-regression: % Female

| Classification                    | Symptom                                   | N Studies | Constant (SE) | Beta (SE)    | R <sup>2</sup> | P value |
|-----------------------------------|-------------------------------------------|-----------|---------------|--------------|----------------|---------|
| Cardiopulmonary                   | Breathlessness/<br>Exertional<br>dyspnoea | 20        | -0.23 (0.79)  | -1.93 (1.71) | 0.07           | 0.258   |
|                                   | Chest pain                                | 11        | -2.13 (1.85)  | -1.27 (4.11) | 0.01           | 0.758   |
|                                   | Cough                                     | 16        | -2.43 (1.12)  | 0.02 (2.32)  | 0.00           | 0.994   |
| Gastrointestinal                  | Diarrhoea                                 | 10        | -3.9 (1.46)   | 1.46 (2.87)  | 0.00           | 0.612   |
| Systemic                          | Fatigue                                   | 17        | -0.08 (0.61)  | -1.58 (1.29) | 0.09           | 0.222   |
| Musculoskeletal                   | Muscle pain/<br>Myalgia                   | 12        | -0.37 (1.33)  | -3.97 (3.05) | 0.13           | 0.194   |
| Neurological and<br>neuromuscular | Headache                                  | 11        | -6.29 (1.27)  | 6.7 (2.46)   | 0.43           | 0.007   |
|                                   | Smell disturbance                         | 19        | -4.07 (0.53)  | 4.95 (1.08)  | 0.56           | <0.001  |
|                                   | Taste disturbance                         | 17        | -4.29 (0.63)  | 5.04 (1.27)  | 0.51           | <0.001  |

Figure 13. Metaregression on percentage of female. Neurological and neuromuscular (Headache)

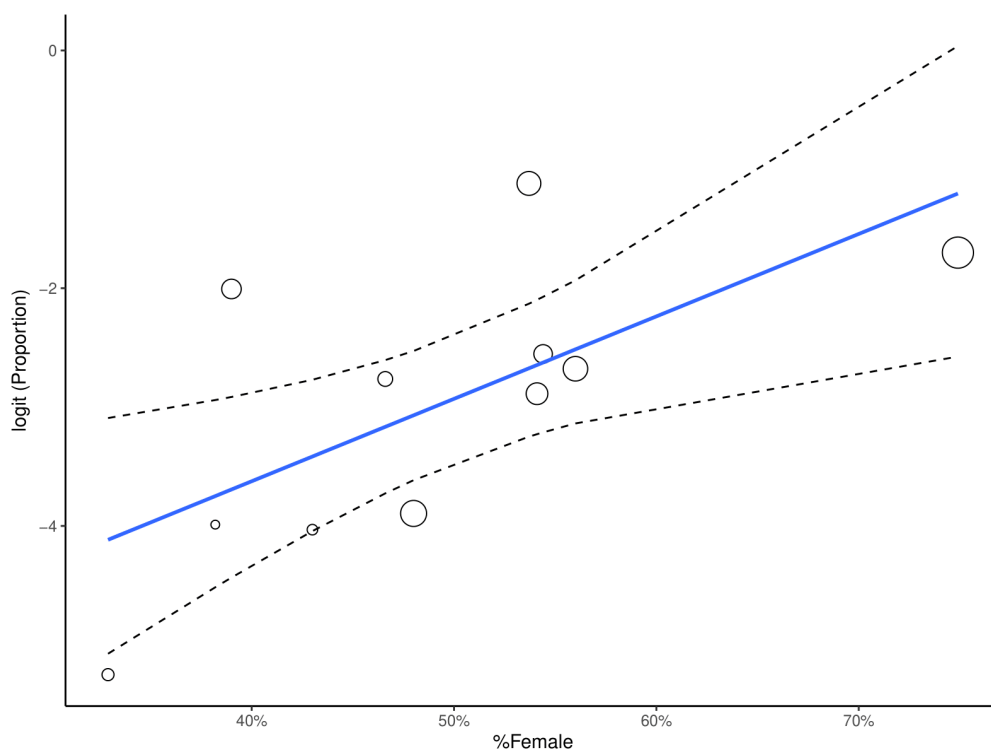

Figure 14. Metaregression on percentage of female. Neurological and neuromuscular (Small disturbance).

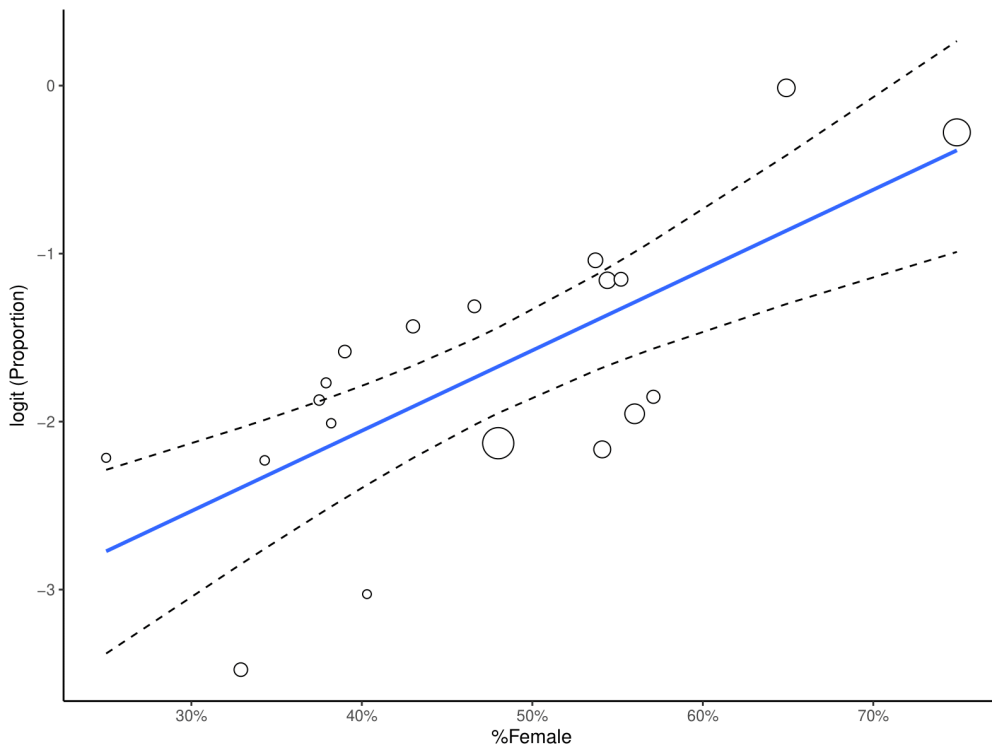

Figure 15. Metaregression on percentage of female. Neurological and neuromuscular (Taste disturbance).

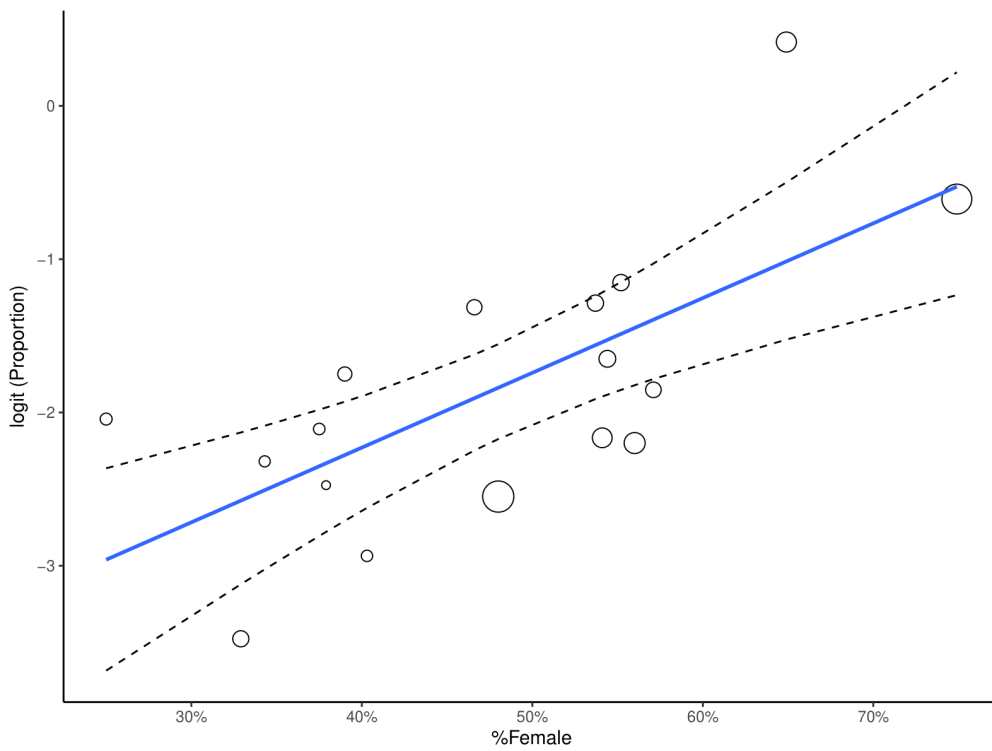

## Supplement 10: Meta-regression: % ICU patients

| Classification                    | Symptom                                   | N Studies | Constant (SE) | Beta (SE)    | R <sup>2</sup> | P value |
|-----------------------------------|-------------------------------------------|-----------|---------------|--------------|----------------|---------|
| Cardiopulmonary                   | Breathlessness/<br>Exertional<br>dyspnoea | 14        | -1.03 (0.31)  | 1.02 (0.89)  | 0.09           | 0.254   |
|                                   | Cough                                     | 11        | -2.25 (0.63)  | -0.75 (2.73) | -0.01*         | 0.783   |
| Systemic                          | Fatigue                                   | 11        | -0.67 (0.29)  | 0.4 (0.81)   | 0.02           | 0.620   |
| Musculoskeletal                   | Muscle pain/<br>Myalgia                   | 11        | -2.71 (0.46)  | 4.19 (2.12)  | 0.27           | 0.048   |
| Neurological and<br>neuromuscular | Smell disturbance                         | 14        | -2.24 (0.26)  | 1.32 (1.3)   | 0.08           | 0.311   |
|                                   | Taste disturbance                         | 12        | -2.45 (0.25)  | 1.72 (1.23)  | 0.16           | 0.161   |

\*poor fitting

Figure 16. Metaregression on percentage of ICU patients. Musculoskeletal (Muscle pain/ Myalgia).

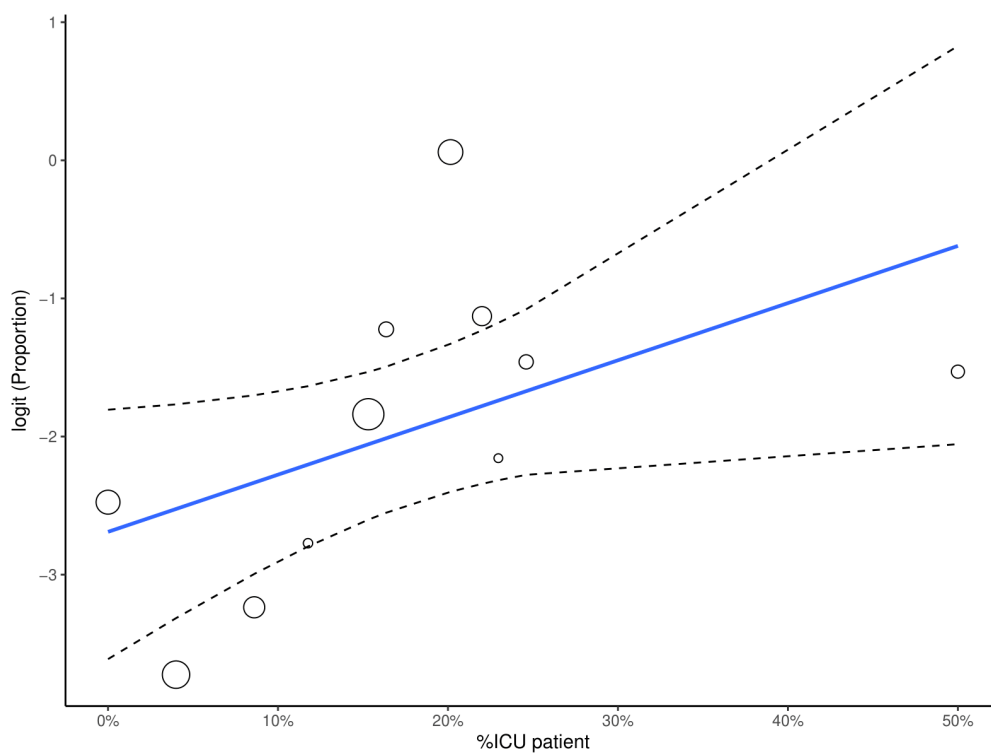

## Supplement 11: Sensitivity analysis: versus removing high risk of bias studies

| Classification                 | Symptom                                | Main results |           |                        | Main results after removing high risk of bias studies |          |                        |
|--------------------------------|----------------------------------------|--------------|-----------|------------------------|-------------------------------------------------------|----------|------------------------|
|                                |                                        | N Studies    | n/Total   | Prop (95% CIs)         | N Studies                                             | n/Total  | Prop (95% CIs)         |
| Cardiopulmonary                | Other cardiovascular symptoms          | n = 3        | 79/1952   | 1.38 (0.01 to 67.44)   | n = 2                                                 | 71/1305  | 1.37 (0.04 to 32.38)   |
|                                | Palpitations                           | n = 8        | 476/4778  | 9.67 (5.95 to 15.34)   | n = 7                                                 | 413/4131 | 9.65 (5.39 to 16.66)   |
|                                | Excessive sputum/<br>Expectoration     | n = 6        | 113/1949  | 5.46 (3.19 to 9.19)    | n = 4                                                 | 88/1326  | 6.22 (2.62 to 14.05)   |
|                                | Cough                                  | n = 16       | 414/5031  | 8.17 (4.85 to 13.44)   | n = 11                                                | 265/3207 | 7.42 (3.38 to 15.55)   |
|                                | Chest pain                             | n = 11       | 308/4878  | 6.36 (3.15 to 12.42)   | n = 8                                                 | 275/3939 | 7.33 (3.25 to 15.68)   |
|                                | Breathlessness/<br>Exertional dyspnoea | n = 20       | 1297/5523 | 25.06 (17.86 to 33.97) | n = 14                                                | 992/3596 | 28.85 (19.67 to 40.16) |
| Gastrointestinal               | Weight loss                            | n = 2        | 97/568    | 20.99 (8.09 to 44.51)  | n = 1                                                 | 50/134   | 37.31 (29.12 to 46.08) |
|                                | Stomach/ Abdominal pain                | n = 4        | 30/1427   | 2.33 (0.54 to 9.42)    | n = 2                                                 | 7/859    | 0.81 (0.39 to 1.70)    |
|                                | Loss of appetite                       | n = 3        | 202/1906  | 17.49 (4.13 to 51.04)  | n = 2                                                 | 174/1789 | 15.09 (6.35 to 31.80)  |
|                                | Diarrhoea                              | n = 10       | 190/3925  | 4.00 (2.07 to 7.57)    | n = 6                                                 | 140/2751 | 4.68 (2.49 to 8.66)    |
|                                | Nausea or Vomiting                     | n = 4        | 49/821    | 6.69 (1.64 to 23.59)   | n = 2                                                 | 20/253   | 7.91 (5.16 to 11.93)   |
| Musculoskeletal                | Impaired mobility                      | n = 6        | 323/2866  | 14.42 (4.67 to 36.73)  | n = 5                                                 | 257/2662 | 12.00 (3.02 to 37.39)  |
|                                | Joint pain/ Arthralgia                 | n = 9        | 437/3960  | 9.39 (5.72 to 15.03)   | n = 6                                                 | 378/3215 | 10.79 (5.21 to 21.00)  |
|                                | Muscle pain/ Myalgia                   | n = 12       | 378/4782  | 11.29 (6.17 to 19.75)  | n = 10                                                | 320/4209 | 11.14 (5.35 to 21.75)  |
| Neurocognitive                 | Other cognitive impairment             | n = 3        | 122/441   | 17.77 (0.08 to 98.23)  | n = 3                                                 | 122/441  | 17.77 (0.08 to 98.23)  |
|                                | Confusion                              | n = 2        | 33/1218   | 2.71 (1.93 to 3.79)    | n = 1                                                 | 23/767   | 3.00 (1.91 to 4.47)    |
|                                | Concentration impairment               | n = 2        | 66/254    | 25.98 (20.96 to 31.73) | n = 1                                                 | 34/134   | 25.37 (18.26 to 33.61) |
|                                | Memory impairment                      | n = 5        | 151/886   | 17.94 (5.26 to 46.25)  | n = 4                                                 | 110/766  | 14.93 (2.77 to 51.97)  |
| Neurological and neuromuscular | Tingling/ Paraesthesia                 | n = 2        | 33/257    | 9.12 (2.21 to 30.87)   | n = 1                                                 | 29/135   | 21.48 (14.88 to 29.37) |
|                                | Visual disturbance                     | n = 2        | 28/586    | 4.78 (3.32 to 6.83)    | n = 1                                                 | 9/135    | 6.67 (3.09 to 12.28)   |
|                                | Smell disturbance                      | n = 19       | 842/5668  | 15.17 (10.75 to 20.97) | n = 13                                                | 513/4258 | 14.08 (8.87 to 21.62)  |
|                                | Taste disturbance                      | n = 17       | 687/5423  | 13.52 (8.96 to 19.89)  | n = 11                                                | 425/4013 | 13.44 (7.31 to 23.42)  |
|                                | Tremors                                | n = 3        | 42/1124   | 3.53 (0.30 to 30.63)   | n = 2                                                 | 38/673   | 6.20 (3.68 to 10.26)   |
|                                | Headache                               | n = 11       | 227/4535  | 4.88 (2.30 to 10.06)   | n = 7                                                 | 115/3298 | 4.19 (1.30 to 12.71)   |
| Other                          | Hair loss                              | n = 5        | 563/2810  | 14.34 (5.33 to 33.23)  | n = 4                                                 | 539/2690 | 13.14 (3.17 to 41.12)  |



|                          |                            |        |           |                        |        |           |                        |
|--------------------------|----------------------------|--------|-----------|------------------------|--------|-----------|------------------------|
|                          | Skin rash                  | n = 4  | 67/2374   | 2.83 (0.95 to 8.16)    | n = 3  | 60/1923   | 3.53 (0.75 to 15.11)   |
| Psychological and social | Sleep disorder             | n = 9  | 742/3442  | 18.15 (9.61 to 31.63)  | n = 8  | 705/3322  | 16.88 (8.18 to 31.65)  |
| Systemic                 | Dizziness                  | n = 5  | 162/3141  | 4.50 (2.53 to 7.86)    | n = 4  | 133/2707  | 4.02 (1.87 to 8.42)    |
|                          | Fever                      | n = 7  | 47/3624   | 1.08 (0.24 to 4.66)    | n = 5  | 23/2739   | 0.91 (0.11 to 7.18)    |
|                          | Fatigue                    | n = 17 | 2207/6039 | 30.97 (23.91 to 39.03) | n = 12 | 1882/4555 | 33.24 (24.57 to 43.22) |
| Upper respiratory        | Other respiratory symptoms | n = 3  | 253/1111  | 15.58 (0.68 to 83.17)  | n = 1  | 210/538   | 39.03 (34.89 to 43.30) |
|                          | Nasal congestion           | n = 3  | 50/1003   | 4.99 (2.73 to 8.92)    | n = 1  | 8/118     | 6.78 (2.97 to 12.92)   |
|                          | Sore throat                | n = 5  | 127/2896  | 4.70 (2.42 to 8.91)    | n = 4  | 106/2445  | 4.70 (1.73 to 12.10)   |

## Supplement 12: Sensitivity analysis: versus statistical methods

| Classification                    | Symptom                                  | N Studies | n/Total   | Main results           | FTDAT/IV*              |
|-----------------------------------|------------------------------------------|-----------|-----------|------------------------|------------------------|
|                                   |                                          |           |           | Prop (95% CIs)         | Prop (95% CIs)         |
| Cardiopulmonary                   | Breathlessness/<br>Exertional dyspnoea   | n = 20    | 1297/5523 | 25.06 (17.86 to 33.97) | 26.68 (20.36 to 33.51) |
|                                   | Palpitations                             | n = 8     | 476/4778  | 9.67 (5.95 to 15.34)   | 10.21 (6.76 to 14.26)  |
|                                   | Cough                                    | n = 16    | 414/5031  | 8.17 (4.85 to 13.44)   | 9.52 (6.16 to 13.50)   |
|                                   | Chest pain                               | n = 11    | 308/4878  | 6.36 (3.15 to 12.42)   | 7.52 (4.29 to 11.52)   |
|                                   | Excessive sputum/<br>Expectoration       | n = 6     | 113/1949  | 5.46 (3.19 to 9.19)    | 5.69 (3.23 to 8.75)    |
|                                   | Flushing                                 | n = 1     | 26/538    | 4.83 (3.18 to 7.00)    | 4.83 (3.17 to 6.82)    |
|                                   | Newly diagnosed<br>hypertension          | n = 1     | 7/538     | 1.30 (0.52 to 2.66)    | 1.30 (0.49 to 2.46)    |
|                                   | Other cardiovascular<br>symptoms         | n = 3     | 79/1952   | 1.38 (0.01 to 67.44)   | 2.99 (0.00 to 12.59)   |
| Gastrointestinal                  | Weight loss                              | n = 2     | 97/568    | 20.99 (8.09 to 44.51)  | 22.47 (3.00 to 52.50)  |
|                                   | Other stomach/<br>Abdominal discomfort   | n = 1     | 21/117    | 17.95 (11.47 to 26.12) | 17.95 (11.47 to 25.47) |
|                                   | Loss of appetite                         | n = 3     | 202/1906  | 17.49 (4.13 to 51.04)  | 18.57 (6.35 to 35.21)  |
|                                   | Nausea or Vomiting                       | n = 4     | 49/821    | 6.69 (1.64 to 23.59)   | 7.69 (1.89 to 16.67)   |
|                                   | Diarrhoea                                | n = 10    | 190/3925  | 4.00 (2.07 to 7.57)    | 4.41 (2.65 to 6.57)    |
|                                   | Bloody stools /<br>Haematochezia         | n = 1     | 2/117     | 1.71 (0.21 to 6.04)    | 1.71 (0.03 to 5.08)    |
|                                   | Stomach/ Abdominal<br>pain               | n = 4     | 30/1427   | 2.33 (0.54 to 9.42)    | 2.63 (0.56 to 5.93)    |
| Musculoskeletal                   | Impaired mobility                        | n = 6     | 323/2866  | 14.42 (4.67 to 36.73)  | 17.09 (7.35 to 29.77)  |
|                                   | Muscle pain/ Myalgia                     | n = 12    | 378/4782  | 11.29 (6.17 to 19.75)  | 13.09 (7.71 to 19.59)  |
|                                   | Joint pain/ Arthralgia                   | n = 9     | 437/3960  | 9.39 (5.72 to 15.03)   | 10.04 (6.33 to 14.46)  |
| Neurocognitive                    | Concentration<br>impairment              | n = 2     | 66/254    | 25.98 (20.96 to 31.73) | 25.98 (20.74 to 31.59) |
|                                   | Memory impairment                        | n = 5     | 151/886   | 17.94 (5.26 to 46.25)  | 20.55 (6.54 to 39.62)  |
|                                   | Other cognitive<br>impairment            | n = 3     | 122/441   | 17.77 (0.08 to 98.23)  | 25.51 (0.00 to 79.72)  |
|                                   | Frontal release signs                    | n = 1     | 20/135    | 14.81 (9.29 to 21.95)  | 14.81 (9.27 to 21.35)  |
|                                   | Confusion                                | n = 2     | 33/1218   | 2.71 (1.93 to 3.79)    | 2.69 (1.84 to 3.69)    |
| Neurological and<br>neuromuscular | Abnormal reflex status                   | n = 1     | 31/135    | 22.96 (16.17 to 30.98) | 22.96 (16.22 to 30.47) |
|                                   | Other neurological<br>diseases           | n = 1     | 20/135    | 14.81 (9.29 to 21.95)  | 14.81 (9.27 to 21.35)  |
|                                   | Smell disturbance                        | n = 19    | 842/5668  | 15.17 (10.75 to 20.97) | 16.48 (11.36 to 22.31) |
|                                   | Taste disturbance                        | n = 17    | 687/5423  | 13.52 (8.96 to 19.89)  | 14.99 (9.76 to 21.09)  |
|                                   | Decreased sensation or<br>sensibility    | n = 2     | 30/269    | 10.90 (6.71 to 17.22)  | 10.88 (4.73 to 19.05)  |
|                                   | Tingling/ Paraesthesia                   | n = 2     | 33/257    | 9.12 (2.21 to 30.87)   | 10.74 (0.02 to 34.12)  |
|                                   | Muscle atrophy                           | n = 1     | 9/135     | 6.67 (3.09 to 12.28)   | 6.67 (2.98 to 11.58)   |
|                                   | Headache                                 | n = 11    | 227/4535  | 4.88 (2.30 to 10.06)   | 6.12 (2.97 to 10.25)   |
|                                   | Slowness of<br>movement/<br>Bradykinesia | n = 1     | 7/135     | 5.19 (2.11 to 10.39)   | 5.19 (1.98 to 9.67)    |
|                                   | Visual disturbance                       | n = 2     | 28/586    | 4.78 (3.32 to 6.83)    | 4.86 (2.79 to 7.43)    |
|                                   | Abnormal muscle tone                     | n = 1     | 6/135     | 4.44 (1.65 to 9.42)    | 4.44 (1.50 to 8.68)    |
|                                   | Tremors                                  | n = 3     | 42/1124   | 3.53 (0.30 to 30.63)   | 4.12 (0.76 to 9.75)    |
|                                   | Walking/ Gait<br>abnormality             | n = 3     | 34/809    | 4.20 (2.02 to 8.53)    | 4.11 (2.80 to 5.63)    |

|                             |                                          |        |           |                        |                        |
|-----------------------------|------------------------------------------|--------|-----------|------------------------|------------------------|
|                             | Trigeminal neuralgia                     | n = 1  | 4/122     | 3.28 (0.90 to 8.18)    | 3.28 (0.71 to 7.33)    |
|                             | Speech difficulty/<br>Dysarthria         | n = 1  | 3/135     | 2.22 (0.46 to 6.36)    | 2.22 (0.28 to 5.56)    |
|                             | Ear/ Hearing<br>conditions               | n = 1  | 5/451     | 1.11 (0.36 to 2.57)    | 1.11 (0.31 to 2.33)    |
|                             | Lack of coordination/<br>Dysmetria       | n = 1  | 2/135     | 1.48 (0.18 to 5.25)    | 1.48 (0.02 to 4.41)    |
|                             | Seizures/ Cramps                         | n = 1  | 6/451     | 1.33 (0.49 to 2.87)    | 1.33 (0.44 to 2.63)    |
| Other                       | Hair loss                                | n = 5  | 563/2810  | 14.34 (5.33 to 33.23)  | 15.86 (7.42 to 26.68)  |
|                             | Skin rash                                | n = 4  | 67/2374   | 2.83 (0.95 to 8.16)    | 2.86 (1.29 to 4.96)    |
|                             | Conjunctivitis                           | n = 1  | 8/451     | 1.77 (0.77 to 3.47)    | 1.77 (0.73 to 3.23)    |
| Psychological and<br>social | Reduced quality of life                  | n = 3  | 340/807   | 36.76 (18.43 to 59.93) | 36.60 (23.89 to 50.32) |
|                             | Anxiety                                  | n = 7  | 650/3551  | 18.73 (8.89 to 35.25)  | 20.39 (11.95 to 30.38) |
|                             | Sleep disorder                           | n = 9  | 742/3442  | 18.15 (9.61 to 31.63)  | 20.01 (12.32 to 28.99) |
|                             | PTSD                                     | n = 6  | 329/2057  | 9.14 (3.66 to 21.04)   | 10.41 (3.36 to 20.59)  |
|                             | Depression                               | n = 6  | 485/3662  | 8.06 (4.14 to 15.10)   | 8.72 (3.02 to 16.93)   |
|                             | Care dependency                          | n = 3  | 160/2555  | 5.89 (0.46 to 45.96)   | 7.24 (0.36 to 21.24)   |
|                             | Low mood/ Dysphoria                      | n = 3  | 62/898    | 1.79 (0.00 to 98.74)   | 7.49 (0.00 to 31.80)   |
| Systemic                    | Weakness                                 | n = 2  | 186/513   | 41.20 (25.43 to 59.01) | 41.62 (19.16 to 66.08) |
|                             | General malaise                          | n = 2  | 292/672   | 32.68 (14.91 to 57.36) | 33.47 (8.11 to 65.59)  |
|                             | Fatigue                                  | n = 17 | 2207/6039 | 30.97 (23.91 to 39.03) | 31.75 (22.81 to 41.41) |
|                             | Sweat or night sweats                    | n = 2  | 162/683   | 23.72 (20.68 to 27.05) | 23.68 (20.55 to 26.96) |
|                             | Dizziness                                | n = 5  | 162/3141  | 4.50 (2.53 to 7.86)    | 4.58 (2.80 to 6.76)    |
|                             | Enlarged lymph nodes/<br>Lymphadenopathy | n = 1  | 4/451     | 0.89 (0.24 to 2.26)    | 0.89 (0.19 to 2.01)    |
|                             | Fever                                    | n = 7  | 47/3624   | 1.08 (0.24 to 4.66)    | 1.74 (0.28 to 4.14)    |
| Upper respiratory           | Other respiratory<br>symptoms            | n = 3  | 253/1111  | 15.58 (0.68 to 83.17)  | 19.30 (0.95 to 52.06)  |
|                             | Voice change                             | n = 1  | 11/134    | 8.21 (4.17 to 14.21)   | 8.21 (4.08 to 13.53)   |
|                             | Nasal congestion                         | n = 3  | 50/1003   | 4.99 (2.73 to 8.92)    | 4.89 (3.61 to 6.34)    |
|                             | Sore throat                              | n = 5  | 127/2896  | 4.70 (2.42 to 8.91)    | 4.66 (2.94 to 6.74)    |

\* FTDAT/IV: Freeman-Tukey Double arcsine transformation within inverse Variance Method

## Supplement 13: Funnel plots

Figure 17. Funnel plot. Cardiopulmonary (Breathlessness or Exertional dyspnoea) by Egger's method

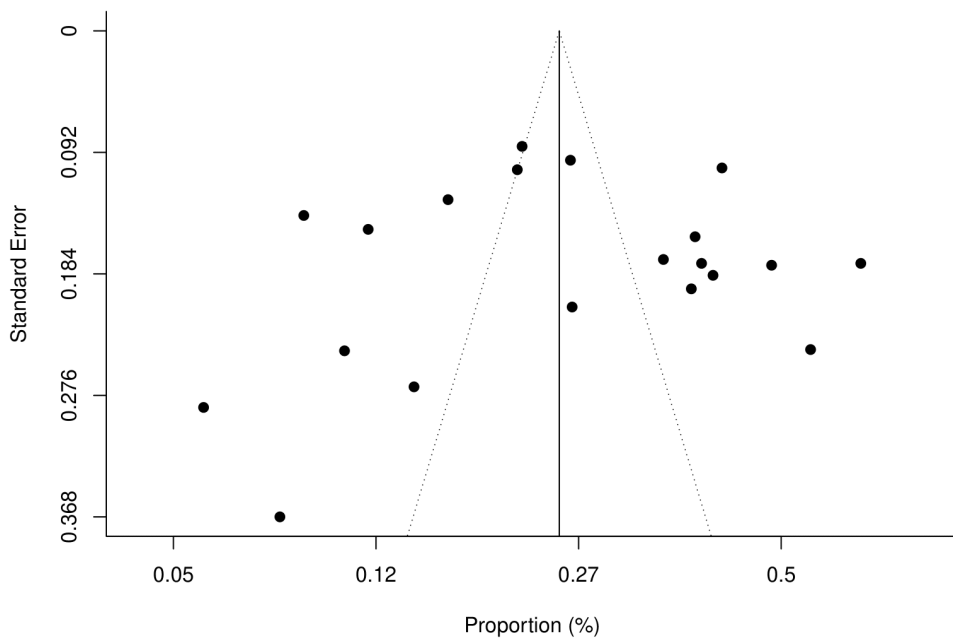

Figure 18. Funnel plot. Cardiopulmonary (Breathlessness or Exertional dyspnoea) by Peter's method

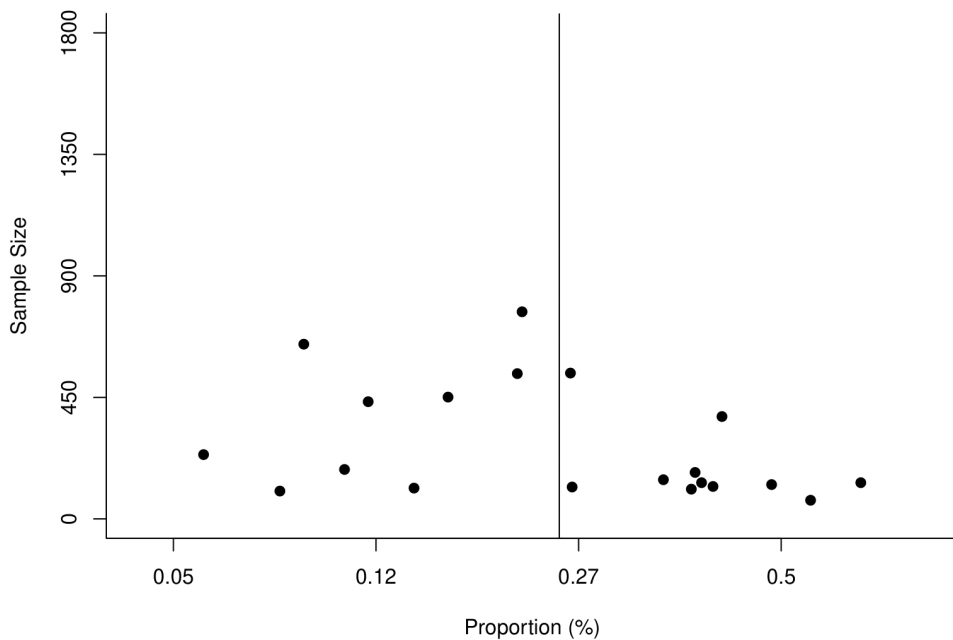

Figure 19. Funnel plot. Cardiopulmonary (Chest pain) by Egger's method

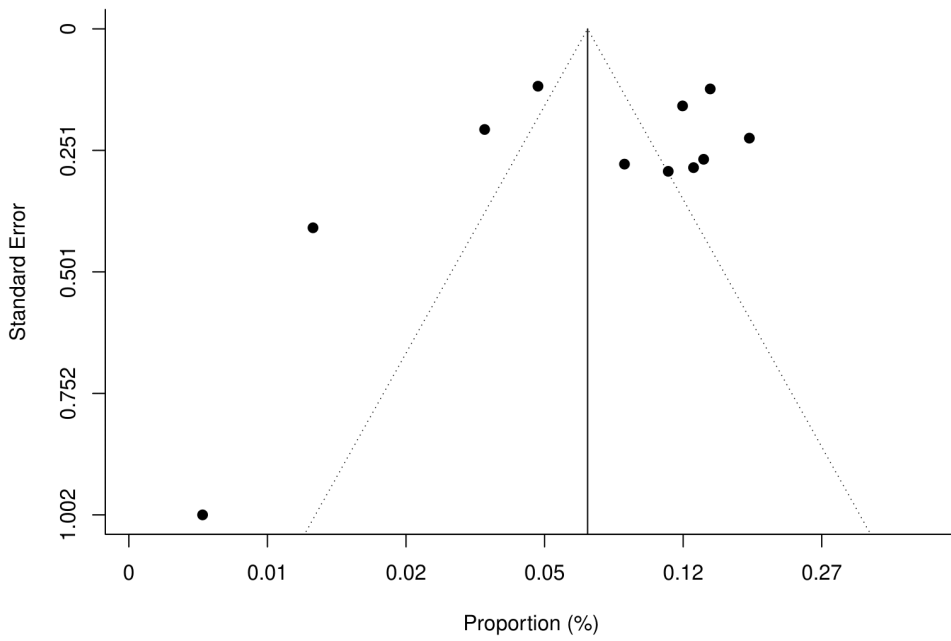

Figure 20. Funnel plot. Cardiopulmonary (Chest pain) by Peter's method

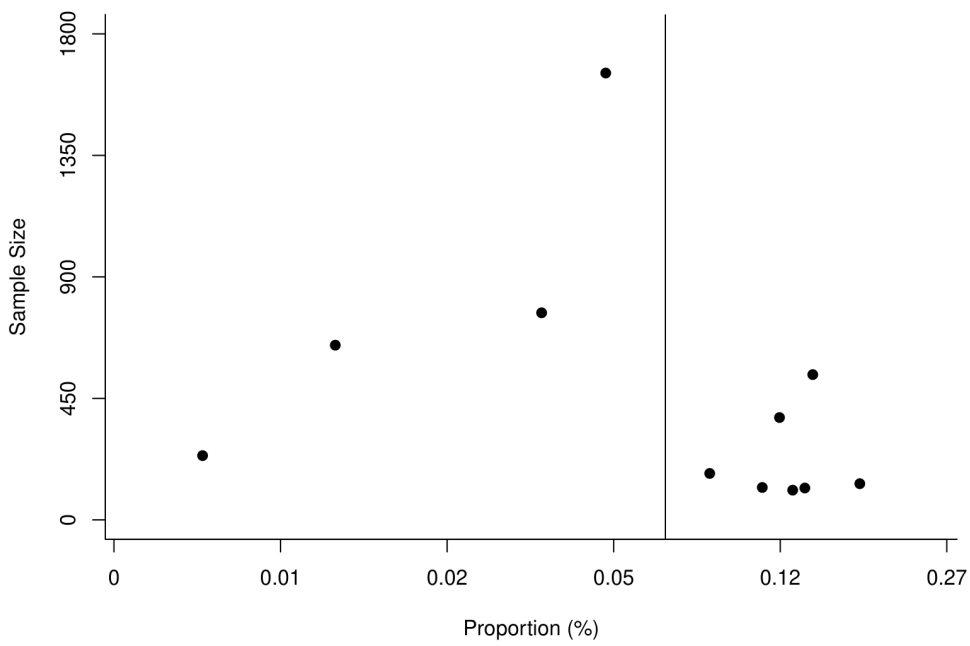

Figure 21. Funnel plot. Cardiopulmonary (Cough) by Egger's method

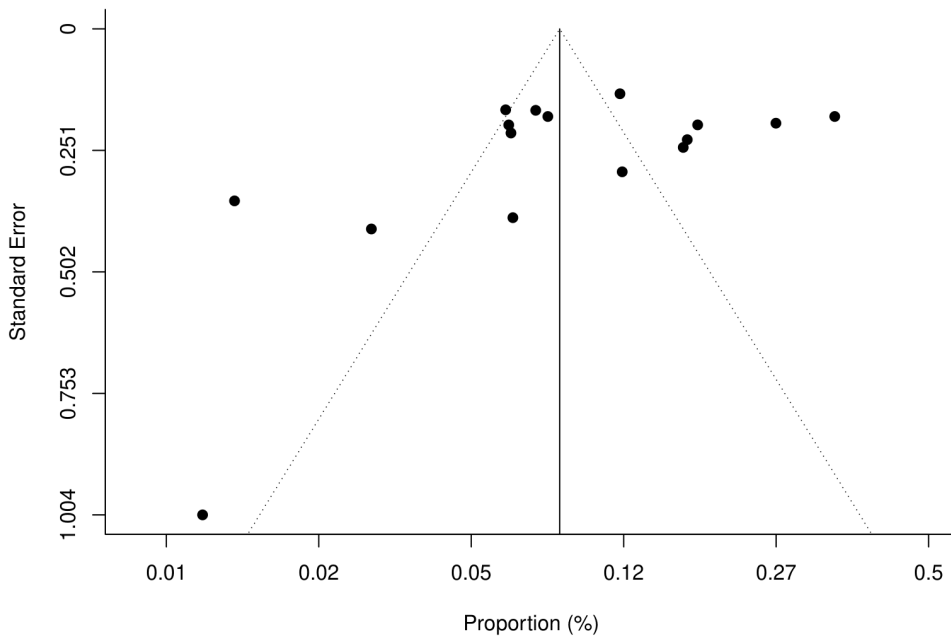

Figure 22. Funnel plot. Cardiopulmonary (Cough) by Peter's method

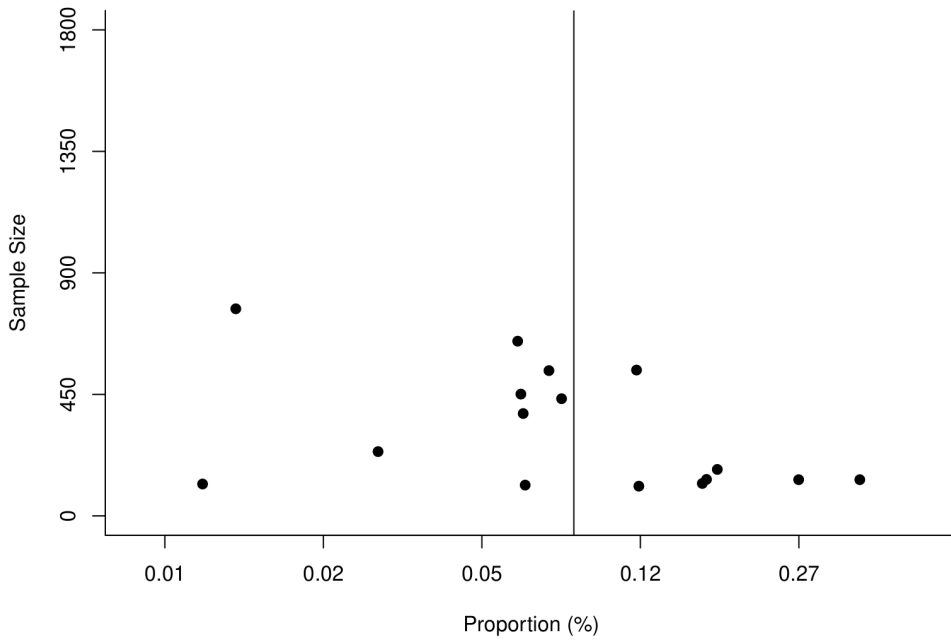

Figure 23. Funnel plot. Gastrointestinal (Diarrhoea) by Egger's method

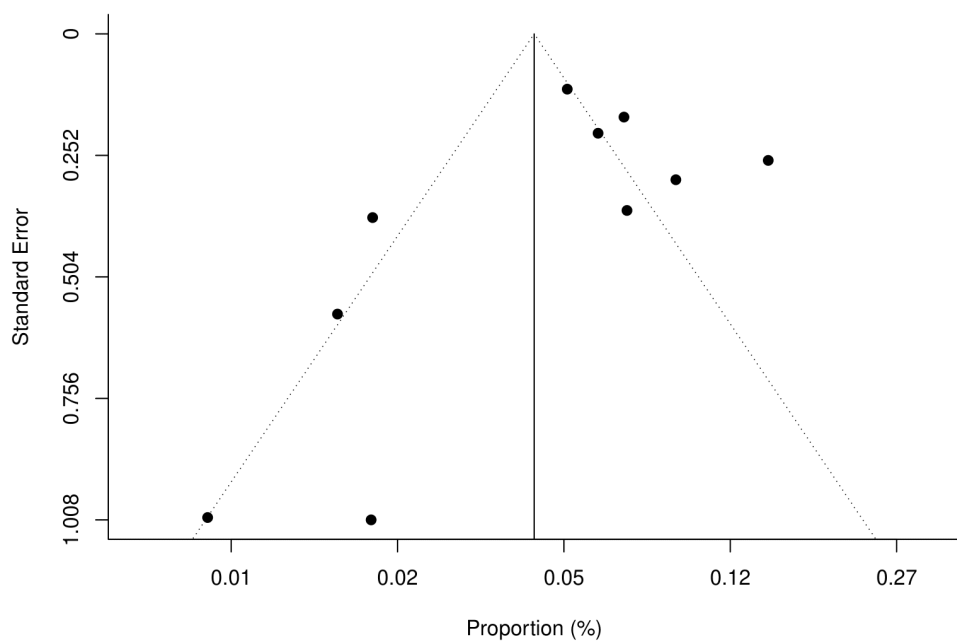

Figure 24. Funnel plot. Gastrointestinal (Diarrhoea) by Peter's method

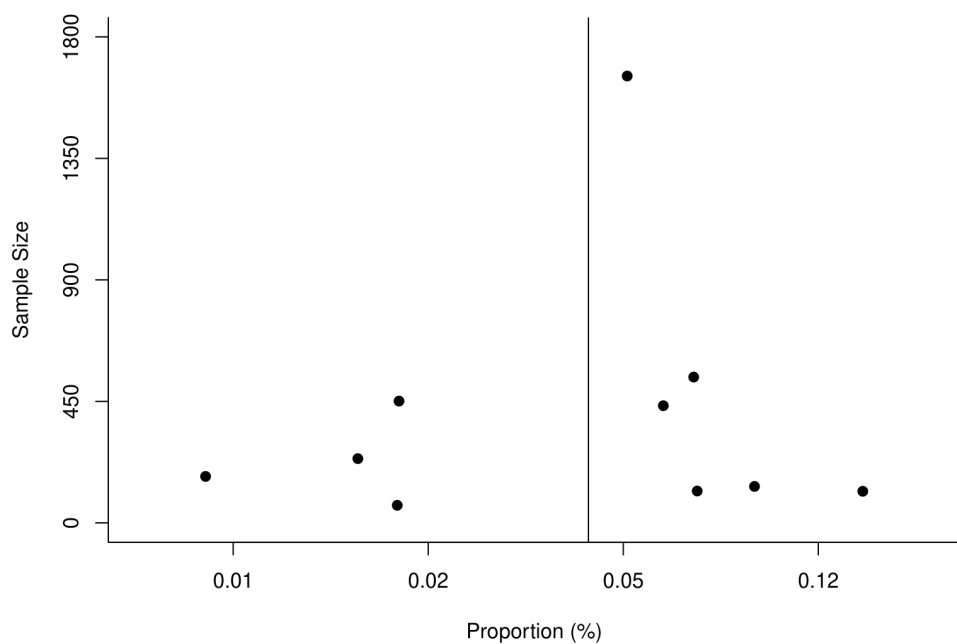

Figure 25. Funnel plot. Musculoskeletal (Muscle pain or Myalgia) by Egger's method

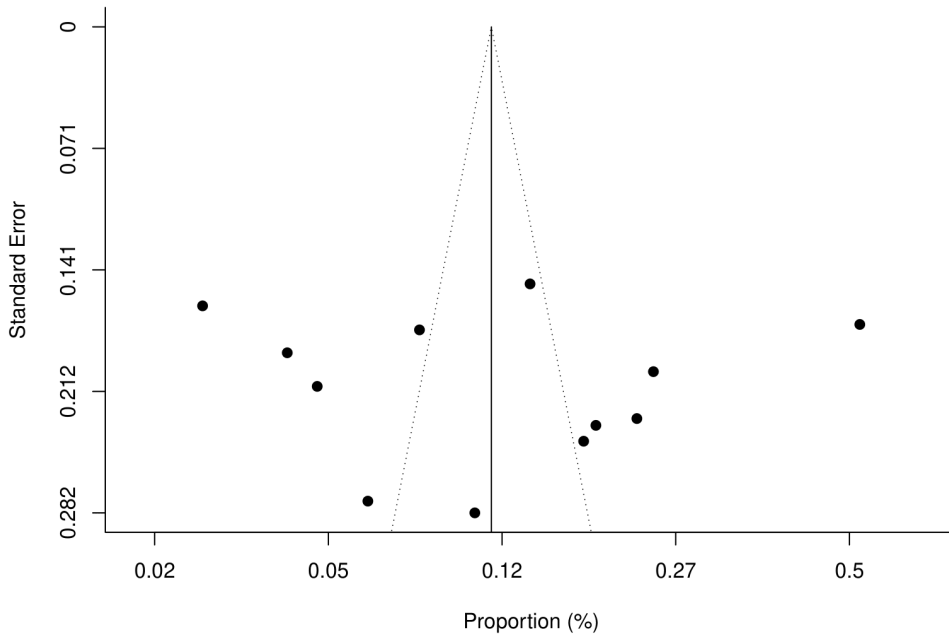

Figure 26. Funnel plot. Musculoskeletal (Muscle pain or Myalgia) by Peter's method

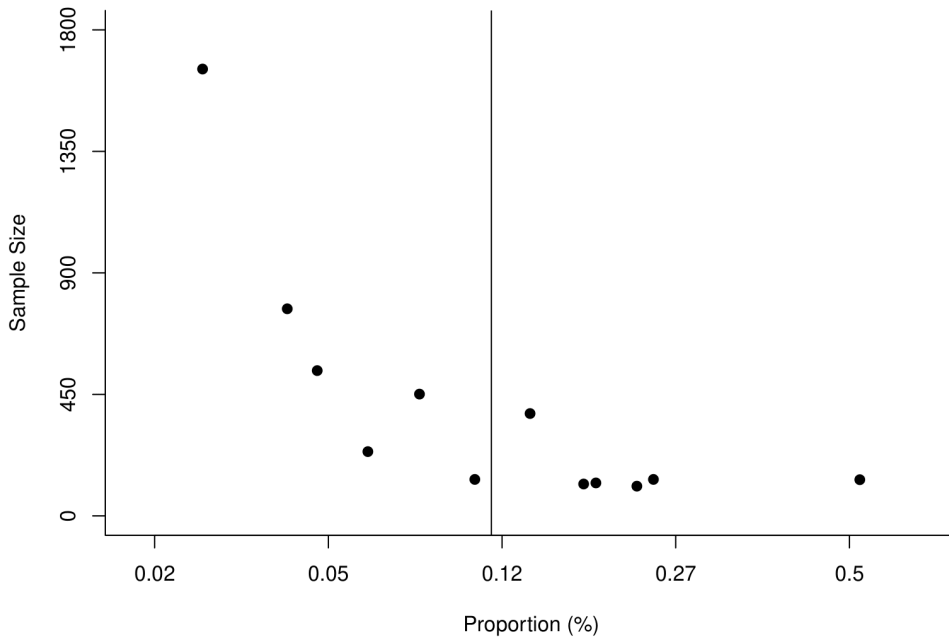



Figure 27. Funnel plot. Neurological and neuromuscular (Headache) by Egger's method

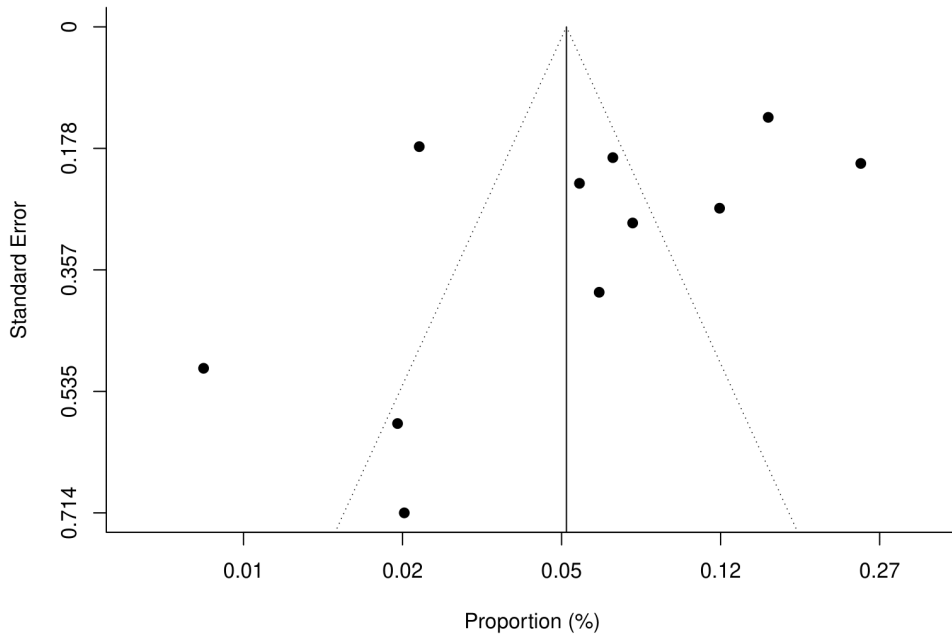

Figure 28. Neurological and neuromuscular (Headache) by Peter's method

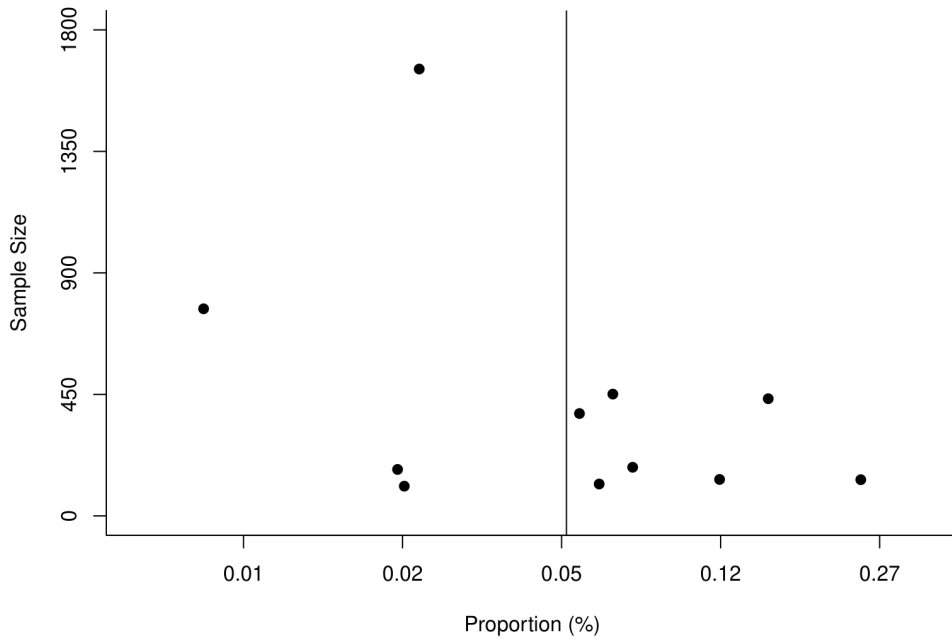

Figure 29. Funnel plot. Neurological and neuromuscular (Smell disturbance) by Egger's method

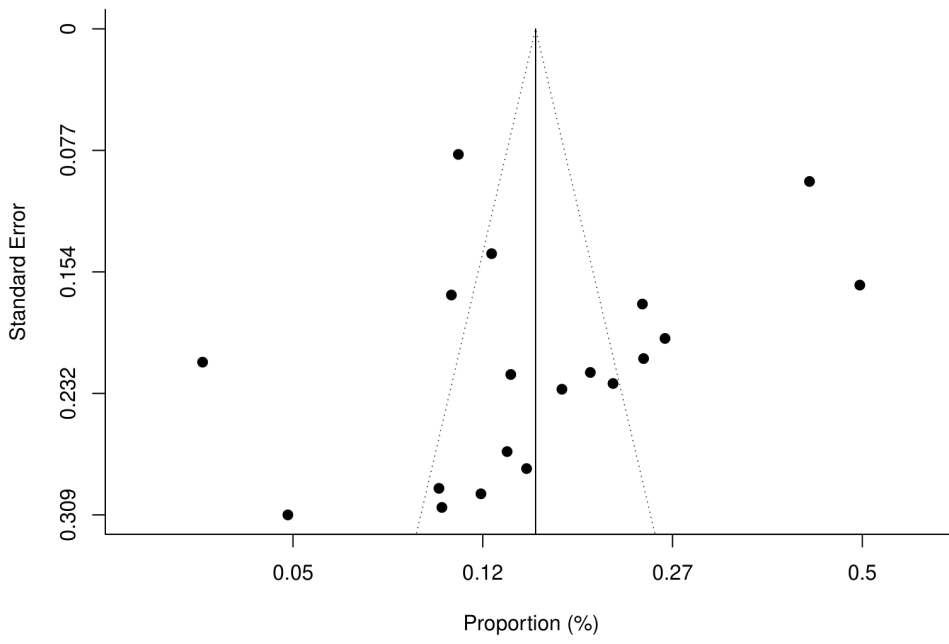

Figure 30. Neurological and neuromuscular (Smell disturbance) by Peter's method

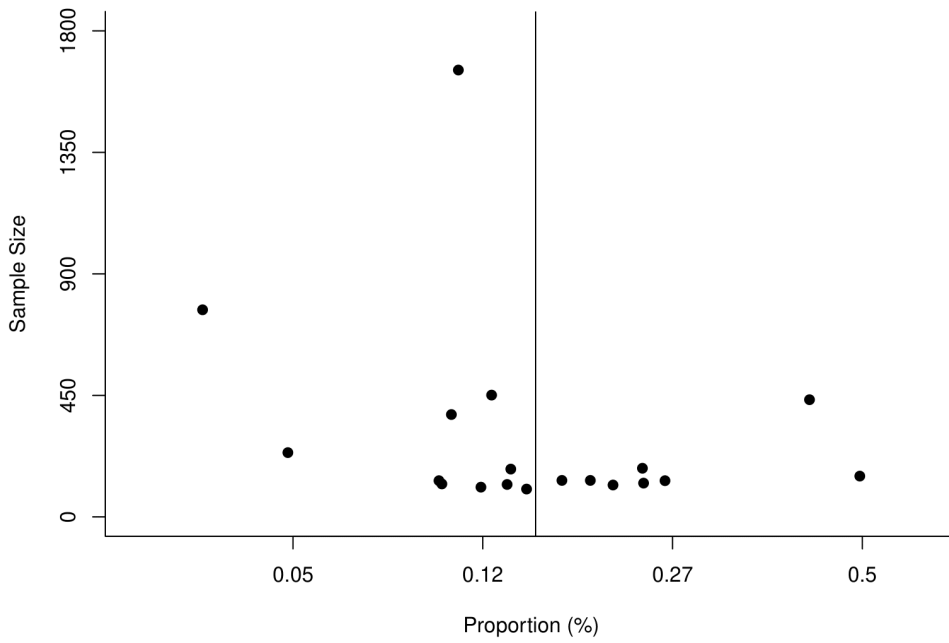

Figure 31. Funnel plot. Neurological and neuromuscular (Taste disturbance) by Egger's method

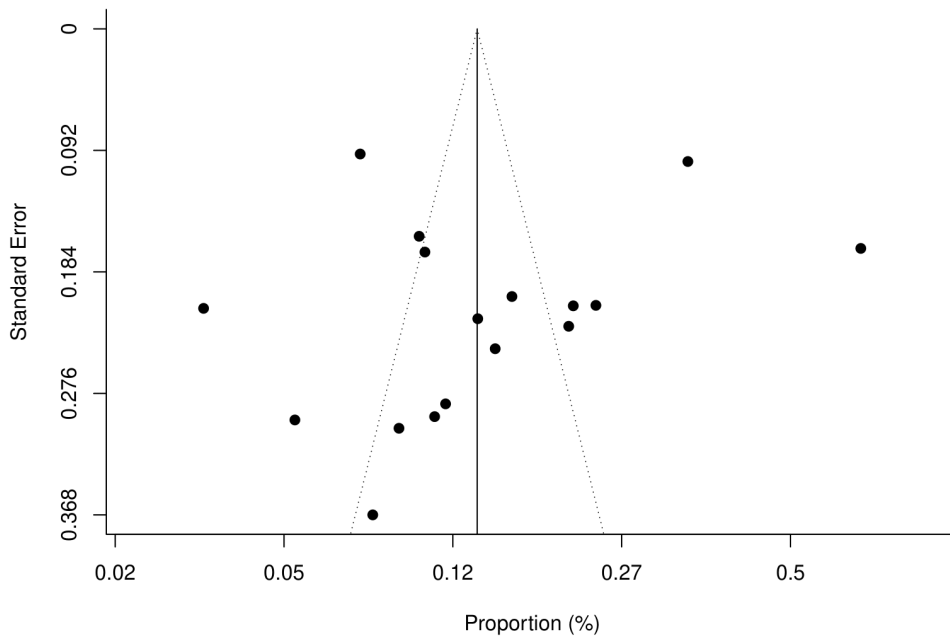

Figure 32. Funnel plot. Neurological and neuromuscular (Taste disturbance) by Peter's method

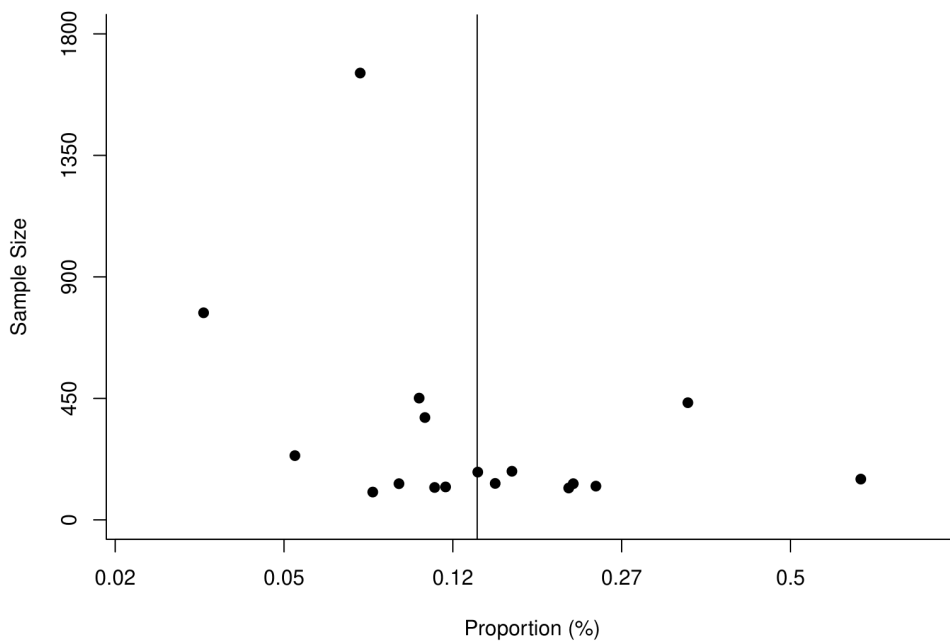

Figure 33. Funnel plot. Systemic (Fatigue) by Egger's method

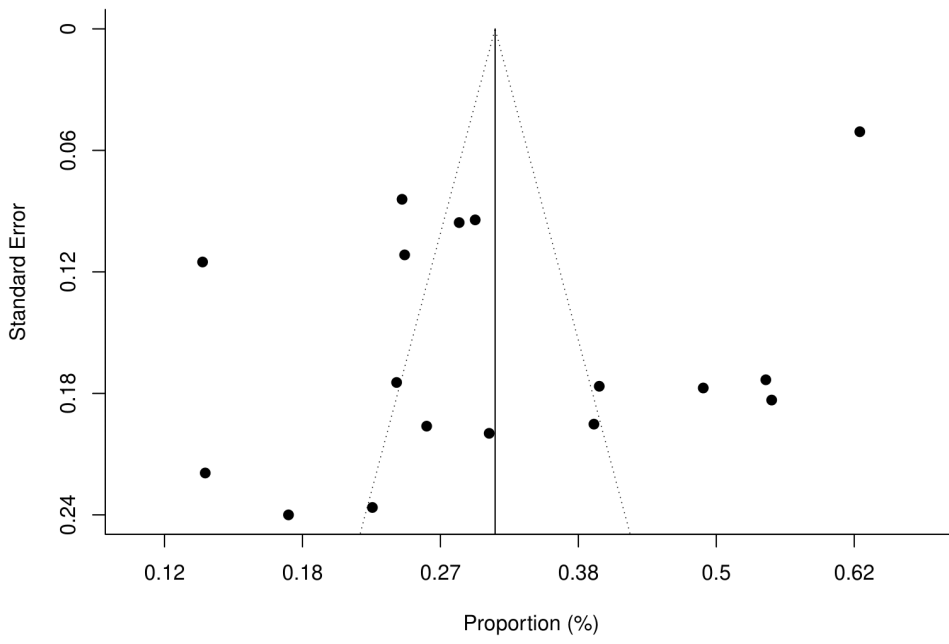

Figure 34. Funnel plot. Systemic (Fatigue) by Peter's method

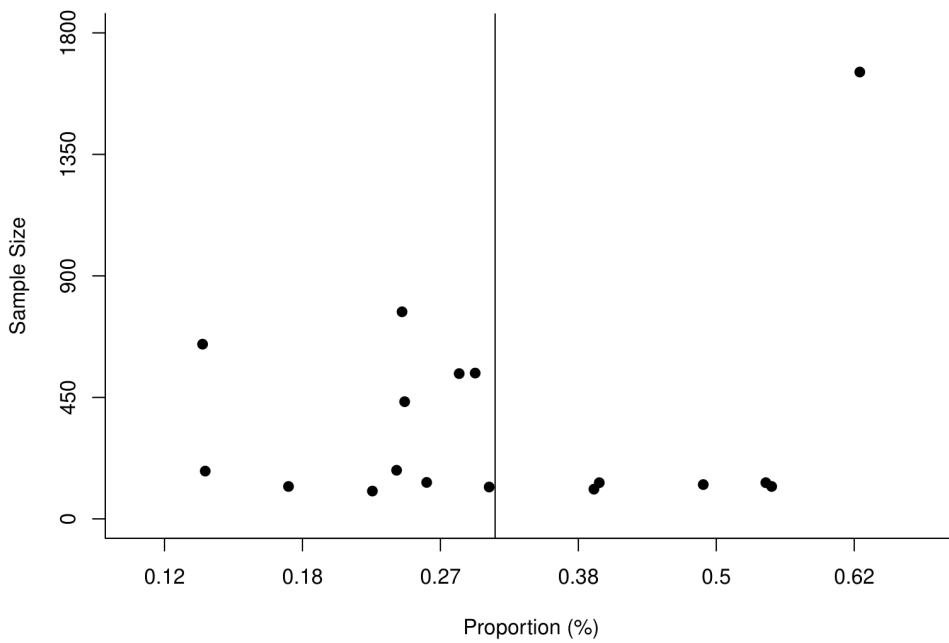

## Supplement 14: Risk factors

| Study                 | Category      | Risk factor                               | Associated with                                                                   | Method                                  | P Value/ CI                                                                                                                               |
|-----------------------|---------------|-------------------------------------------|-----------------------------------------------------------------------------------|-----------------------------------------|-------------------------------------------------------------------------------------------------------------------------------------------|
| Nguyen et al.         | Sex           | Female sex                                | Persistent symptoms                                                               | Chi-squared or the Fisher exact test    | p = 0.02                                                                                                                                  |
| Mazza et al.          | Sex           | Female sex                                | Persistence of depressive symptomatology                                          | Multivariate GLM analysis               | (Wilks' $\lambda$ = 0.92; F = 5.76; p = 0.003)                                                                                            |
|                       | Comorbidities | Previous psychiatric diagnosis            |                                                                                   |                                         | (Wilks' $\lambda$ = 0.93; F = 5.29; p = 0.006)                                                                                            |
|                       | Severity      | Presence of psychopathology at one-month  |                                                                                   |                                         | (Wilks' $\lambda$ = 0.82; F = 15.16; p < 0.001)                                                                                           |
| Parentes-Arias et al. | Age           | <60 years                                 | Olfactory dysfunction                                                             | Multivariable-adjusted ORs              | p = 0.028                                                                                                                                 |
|                       | Sex           | Female sex                                |                                                                                   |                                         | p = 0.003                                                                                                                                 |
|                       | Comorbidities | 1 comorbidity                             |                                                                                   |                                         | p = 0.031                                                                                                                                 |
| Xiong et al.          | Sex           | Female sex                                | Covid-19 sequelae                                                                 | Multivariable logistic regression model | Physical decline/fatigue (p < 0.01)<br>Postactivity polypnoea (p= 0.04)<br>Alopecia (p < 0.01)                                            |
|                       | Severity      | Dyspnea during hospitalisation            | Physical decline/fatigue, postactivity polypnoea and resting heart rate increases | Univariate analysis                     | Physical decline/fatigue (p=.02)<br>Postactivity polypnoea (p=.01)<br>Resting heart rate increases (p=.01)                                |
| Sykes et al.          | Sex           | Female sex                                | Persistent symptoms                                                               | Chi-Square and Mann–Whitney U testing   | Anxiety (p=0.001), low mood (p=0.031), myalgia (p=0.022), fatigue (p=0.004), sleep disturbance (p=0.009), and memory impairment (p=0.001) |
| Taboada et al.        | Age           | Age                                       | Limitations in the functional status (grade II-IV of PCSF)                        | Multivariate logistic regression model  | (OR = 2.600, 95% CI: 1.192–5.671)                                                                                                         |
|                       | Severity      | Length of hospital stay                   |                                                                                   |                                         | (OR = 1.049, 95% CI: 1.009–1.090)                                                                                                         |
|                       | Severity      | Admission to ICU / mechanical ventilation |                                                                                   |                                         | P < 0.001                                                                                                                                 |
| Qu et al.             | Sex           | Female sex                                | Poor QoL scores                                                                   | Logistic regression                     | (OR: 1.79, 95% CI: 1.04–3.06)                                                                                                             |
|                       | Age           | Older age ( $\geq 60$ years)              |                                                                                   |                                         | (OR: 2.44, 95% CI: 1.33–4.47)                                                                                                             |
|                       | Severity      | Physical symptom after discharge          |                                                                                   |                                         | (OR: 40.15, 95% CI: 9.68–166.49)                                                                                                          |
| Einvik et al.         | Sex           | Female sex                                | Symptoms of post-traumatic stress                                                 | Multivariable linear regression         | NR                                                                                                                                        |
|                       | Ethnicity     | Born outside Norway                       |                                                                                   |                                         |                                                                                                                                           |
|                       | Severity      | Dyspnoea during COVID-19                  |                                                                                   |                                         |                                                                                                                                           |

|                 |               |                                                                                                                                                                                                                                                                                                                               |                                |                                                                                                                                                                    |                                          |
|-----------------|---------------|-------------------------------------------------------------------------------------------------------------------------------------------------------------------------------------------------------------------------------------------------------------------------------------------------------------------------------|--------------------------------|--------------------------------------------------------------------------------------------------------------------------------------------------------------------|------------------------------------------|
| Gherlone et al. | Comorbidities | COPD                                                                                                                                                                                                                                                                                                                          | Dry mouth                      | Multivariable analysis                                                                                                                                             | (OR= 9.10, 95% CI: 1.8 -68.49)           |
| Stavem et al.   | Severity      | Number of symptoms (10–23)                                                                                                                                                                                                                                                                                                    | Symptoms at follow-up          | Multivariable negative binomial regression analysis                                                                                                                | (OR= 4.16, 95% CI:2.57 to 6.72, p<0.001) |
|                 | Comorbidities | ≥2                                                                                                                                                                                                                                                                                                                            |                                |                                                                                                                                                                    | (OR=2.52, 95%CI: 1.58 to 4.02, p<0.001)  |
| Baricich et al. | Severity      | ICU admission                                                                                                                                                                                                                                                                                                                 | Physical impairment            | Multivariable logistic regression model                                                                                                                            | (OR: 3.1, 95%CI: 1.3-7.9, p=0.01)        |
|                 | Age           | Age                                                                                                                                                                                                                                                                                                                           | walking ability (SPPB)         |                                                                                                                                                                    | p <0.02                                  |
|                 | Comorbidities | Number or comorbidities                                                                                                                                                                                                                                                                                                       | walking ability (SPPB)<br>2MWT |                                                                                                                                                                    | p <0.01<br>p <0.04                       |
|                 | Sex           | Male gender                                                                                                                                                                                                                                                                                                                   | SPPB total score               |                                                                                                                                                                    | p <0.01                                  |
| Jacobson et al. | Ethnicity     | Latin ethnicity                                                                                                                                                                                                                                                                                                               | lower expected 6-MWT           | Multivariate analysis                                                                                                                                              | (-7.40 [-11.55-{-3.25}], p=0.001)        |
|                 | Comorbidities | BMI                                                                                                                                                                                                                                                                                                                           |                                |                                                                                                                                                                    | (-0.52 [-0.81-{-0.22}], p=0.001)         |
|                 | Severity      | Persistence of symptoms at follow up                                                                                                                                                                                                                                                                                          | Shortness of breath            |                                                                                                                                                                    | P=0.004                                  |
| Petersen et al. | Age           | Individuals in age group 50-66 compared with the youngest groups:<br>0-17 years<br>18-34 years                                                                                                                                                                                                                                | Persistent symptoms            | Age-stratified analysis                                                                                                                                            | p=0.003<br>p=0.001                       |
| Alharthy et al. | Severity      | Increased incidence of dyspnoea and fever prior to hospital admission, decreased ICU admission PaO2/FiO2 ratio < 100, longer duration of mechanical ventilation, increased inflammatory biomarkers such as lactate dehydrogenase, ferritin, and D-dimers on ICU admission, and significant lung abnormalities detected by LUS | Persistent symptoms            | Continuous variables using the Wilcoxon rank sum or the student's t-test. Categorical variables were examined using the Fisher's exact test or the Chi square test | p < 0.05                                 |

|                  |               |                                                                                                                                      |                                                                                   |                                                                |                                                                                                                                                                                                                                                    |
|------------------|---------------|--------------------------------------------------------------------------------------------------------------------------------------|-----------------------------------------------------------------------------------|----------------------------------------------------------------|----------------------------------------------------------------------------------------------------------------------------------------------------------------------------------------------------------------------------------------------------|
| Anastasio et al. | Severity      | Pneumonia and ARDS                                                                                                                   | Shortness of breath                                                               | Pearson's correlation coefficient and Cox regression were used | Patients who developed ARDS showed higher SBP (p=0.05) and DBP (p=0.02) and lower SpO2 during 6 MWT (p=0.004), FVC (p=0.004) and TLC (p<0.001). Patients without ARDS showed higher SR (p<0.001), RV (p<0.001), TLC (p<0.001) and RV/TLC (p=0.05). |
| Han et al.       | Severity      | Higher baseline CT lung involvement score (>=18 out of a possible score of 25)                                                       | Fibrotic-like changes in the lung at 6 months                                     | Multivariate analysis                                          | (OR: 4.2, 95%CI: 1.2-14)                                                                                                                                                                                                                           |
| Blanco et al.    | Severity      | Severity of the disease                                                                                                              | DLCO <80% and a lower serum lactate dehydrogenase level                           | Multivariate analysis                                          | DLCO<80% (OR 5.92; 95%CI 2.28–15.37; p < 0.0001) Serum lactate dehydrogenase (OR 0.98; 95%CI 0.97–0.99)                                                                                                                                            |
| Lerum et al.     | Severity      | ICU admission                                                                                                                        | Persistent CT abnormalities and problems in usual activities                      | Mann–Whitney U-tests or Chi-squared tests                      | p=.031                                                                                                                                                                                                                                             |
| Bellan et al.    | Severity      | Higher DLCO                                                                                                                          | Decreased risk of physical impairment                                             | Univariate analysis and logistic regression models             | (OR, 0.96 [95% CI, 0.94-0.98]; P < .001)                                                                                                                                                                                                           |
|                  | Comorbidities | COPD                                                                                                                                 | Increase risk of physical impairment                                              |                                                                | (OR, 12.70 [95% CI, 1.41-114.85]; P = .02)                                                                                                                                                                                                         |
| Sonnweber et al. | Severity      | Age, gender, and pre-existing diseases such as cardiovascular diseases, pulmonary diseases, diabetes mellitus type 2, and malignancy | Persistence of symptoms, patient performance status, and CT findings at follow-up | Friedman's or Wilcoxon signed-rank test                        | p=0.042 to p<0.001                                                                                                                                                                                                                                 |
| Mendez et al.    | Sex           | Female sex                                                                                                                           | Impaired DLCO                                                                     | Linear regression analysis                                     | 0.002                                                                                                                                                                                                                                              |
|                  | Severity      | ICU patients                                                                                                                         | Pulmonary embolism                                                                |                                                                | p<0.001                                                                                                                                                                                                                                            |
|                  |               | D-dimer levels                                                                                                                       | Impaired DLCO                                                                     |                                                                | p= 0.011                                                                                                                                                                                                                                           |
| Blanco et al.    | Severity      | Lower serum LDH levels                                                                                                               | Impaired DLCO                                                                     | Multivariate analysis                                          | OR 0.98; 95% CI 0.97-0.99; p 0.002                                                                                                                                                                                                                 |
| Qin et al.       | Severity      | Higher TSS of the chest and ARDS lymphocyte count, MPA diameter on admission and ARDS                                                | Impaired DLCO                                                                     | Univariable analysis                                           | TSS>10.5 (OR: 10.5; 95%CI: 2.5-44.1; P=0.001)<br>ARDS ( OR: 4.6; 95%CI: 1.4-15.5; P=0.014 )                                                                                                                                                        |
|                  |               | Long hospital stay                                                                                                                   | Lung sequelae                                                                     |                                                                |                                                                                                                                                                                                                                                    |

|               |               |                                                                                                                                   |                                                                                                 |                                                                                                                                  |                                                                                                                                                                               |
|---------------|---------------|-----------------------------------------------------------------------------------------------------------------------------------|-------------------------------------------------------------------------------------------------|----------------------------------------------------------------------------------------------------------------------------------|-------------------------------------------------------------------------------------------------------------------------------------------------------------------------------|
| Rass et al.   | Severity      | ICU patients                                                                                                                      | New neurological diseases                                                                       | Chi-square or Kruskal-Wallis test                                                                                                | P=0.001                                                                                                                                                                       |
|               | Age           | Elderly                                                                                                                           | Neurological signs                                                                              | NR                                                                                                                               | NR                                                                                                                                                                            |
| Weng et al.   | Severity      | Less severe (Lower frequency of supplemental oxygen therapy (79% vs 94%; p=0.016), and lower frequency of ICU admission           | Gastrointestinal sequelae                                                                       | Univariable and multivariable logistic regressions                                                                               | p=0.016                                                                                                                                                                       |
|               |               | Treated more often with proton pump inhibitors (PPIs) and corticosteroids and were less frequently treated with enteral nutrition |                                                                                                 |                                                                                                                                  | PPI (p=0.000)<br>Corticosteroids (p=0.024)<br>Enteral nutrition (p=0.007)                                                                                                     |
| Arnold et al. | Severity      | Severe cases                                                                                                                      | Lower physical score                                                                            | Mann Whitney-U and Kruskal Wallis tests for continuous data and Fisher's exact test or Chi-squared testing for categorical data. | NR                                                                                                                                                                            |
| Sibila et al. | Sex           | Male gender                                                                                                                       | Spirometric abnormalities 3 months after discharge,=                                            | NR                                                                                                                               | Reduced FEV1: (76.9% vs 51.2%, p = 0.005)<br>Reduced FVC: (76.3% vs 51.6%, p = 0.008)                                                                                         |
|               | Comorbidities | Cardiovascular disease and diabetes                                                                                               |                                                                                                 |                                                                                                                                  | Reduced FEV1:<br>Cardiovascular disease (34.2% vs 9.4%, p = 0.001)<br>Diabetes (28.9% vs 12%, p = 0.02)<br>Reduced FVC:<br>Cardiovascular disease (29.7% vs 11.0%, p = 0.009) |
| Huang et al.  | Severity      | Participants with severity scale 5–6                                                                                              | Higher risk of lung diffusion impairment, anxiety or depression, and fatigue or muscle weakness | Multivariable analysis                                                                                                           | OR 4.60 (95% CI 1.85–11.48) for diffusion impairment, OR 1.77 (1.05–2.97) for anxiety or depression, and OR 2.69 (1.46–4.96) for fatigue or muscle weakness                   |
|               | Sex           | Female sex                                                                                                                        |                                                                                                 |                                                                                                                                  |                                                                                                                                                                               |

ARDS: Acute respiratory distress syndrome; BMI: Body mass index; CT: Computerised Topography; DCLC: diffusing capacity for carbon monoxide; ICU: Intensive care unit; LDH: Lactate dehydrogenase; LUS: lung ultrasound; MWT: minute walking test; NR: Not reported; OR: Odds Ratio; PCSF: post covid functional status; QoL: Quality of life; SPPB: Short Physical Performance Battery test; TSS: Toxic shock syndrome
